# Supplementary material for: Iron-catalysed sequential reaction towards α-aminonitriles from secondary amines, primary alcohols and trimethylsilyl cyanide
Source: Royal Society of Chemistry journal article supplement (doi:10.1039/c5cc10346k), 2016-01-01

# Supporting Information

## Iron-Catalyzed Sequential Reaction toward $\alpha$ -Aminonitriles from Secondary Amines, Primary Alcohols and Trimethylsilyl Cyanide

Hang Shen,<sup>a</sup> Liangzhen Hu,<sup>a</sup> Qing Liu,<sup>a</sup> Muhammad Ijaz Hussain,<sup>a</sup> Jing Pan,<sup>a</sup>

Mingming Huang,<sup>a</sup> and Yan Xiong\*<sup>a,b</sup>

<sup>a</sup>School of Chemistry and Chemical Engineering, Chongqing University, Chongqing 400044, China

<sup>b</sup>State Key Laboratory of Elemento-Organic Chemistry, Nankai University, Tianjin 300071, China

[xiong@cqu.edu.cn](mailto:xiong@cqu.edu.cn)

### Table of contents

|                                                                                                            |    |
|------------------------------------------------------------------------------------------------------------|----|
| 1. General Methods .....                                                                                   | S2 |
| 2. Experimental Procedures .....                                                                           | S2 |
| 2.1 General procedure for synthesis of <b>1e</b> , <b>1f</b> , <b>1m</b> , <b>1n</b> and <b>1o-s</b> ..... | S2 |
| 2.2 General procedure for synthesis of <b>2</b> .....                                                      | S2 |
| 3. Optimization of reaction conditions and control experiment .....                                        | S2 |
| 4. <sup>1</sup> H- and <sup>13</sup> C-NMR analytical data .....                                           | S5 |
| 5. References .....                                                                                        | S9 |
| 6. <sup>1</sup> H- and <sup>13</sup> C-NMR spectra .....                                                   | S9 |

## 1. General Methods

$^1\text{H}$ - and  $^{13}\text{C}$ -NMR spectra were recorded in  $\text{CDCl}_3$  solution on a Bruker Avance 500 spectrometer at 20~25 °C.  $^1\text{H}$  NMR spectra were reported in parts per million using tetramethylsilane TMS ( $\delta = 0.00$  ppm) as an internal standard. The data of  $^1\text{H}$  NMR are reported as follows: chemical shift, multiplicity (s = singlet, d = doublet, t = triplet, q = quartet, quin = quintet, m = multiplet), coupling constants ( $J$ , Hz), and integration.  $^{13}\text{C}$  NMR spectra were reported in parts per million using solvent  $\text{CDCl}_3$  ( $\delta = 77.2$  ppm) or DMSO ( $\delta = 39.5$  ppm) as an internal standard, The data of  $^{13}\text{C}$  NMR are reported as follows: chemical shift, multiplicity (s = singlet, d = doublet, t = triplet, q = quartet, quin = quintet, m = multiplet), and coupling constants ( $J$ , Hz). High resolution mass spectra (HRMS) were obtained with a Q-TOF MS spectrometer. Reactions were monitored by TLC and column chromatography was performed using silica gel. Commercially available reagents were used without further purification unless otherwise specified.

## 2. Experimental Procedures

### 2.1 General procedure for synthesis of 1e, 1f, 1m, 1n and 1o-s

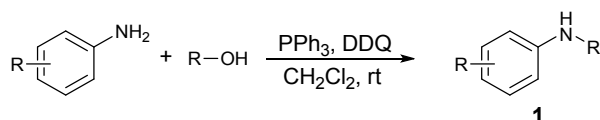

Compound **1** were synthesized according to the reported method:<sup>1</sup> To a flask containing a stirred mixture of  $\text{Ph}_3\text{P}$  (0.314 g, 1.2 mmol) and DDQ (0.272 g, 1.2 mmol) in dichloromethane (5 mL) was added aniline (1.2 mmol) at room temperature. Alcohol (1.0 mmol) was then added to the reaction mixture. TLC monitoring showed the completion of the reaction. The solvent was evaporated and the residue was chromatographed on a silica gel column to give secondary amine.

### 2.2 General procedure for synthesis of 2

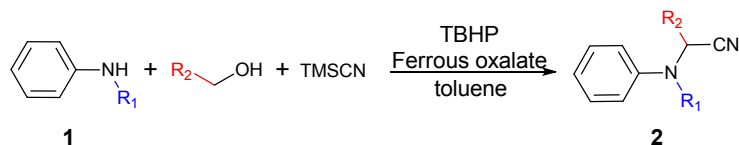

Alcohol (3.75 mmol), TMSCN (0.272 mL, 2 mmol) and ferrous oxalate (0.007 g, 0.05 mmol) were successively added to the stirred solution of secondary amine **1** (0.5 mmol) in a seal tube at room temperature. After addition of TBHP (0.3 mL, 2 mmol,  $\geq 65\%$  in *tert*-butanol), the mixture was stirred at room temperature for 4 h or rose to 90 °C for overnight. Subsequently, the mixture was poured into aqueous  $\text{NaHCO}_3$  and  $\text{Na}_2\text{S}_2\text{O}_3$  solution, and extracted with ethyl acetate. The organic layer was washed with brine, dried over magnesium sulfate and concentrated in vacuo. The residue was chromatographed on a silica gel column to give  $\alpha$ -aminonitrile **2**.

## 3. Optimization of reaction conditions and control experiment

**Table 1S.** Evaluation of oxidants, catalysts and solvents<sup>a</sup>

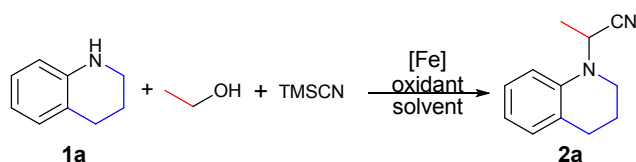

| Entry     | Catalyst                                | Oxidant                       | Solvent                         | Time (h) | Yield (%) <sup>b</sup> |
|-----------|-----------------------------------------|-------------------------------|---------------------------------|----------|------------------------|
| 3         | CuI                                     | TBHP                          | DCE                             | 10       | 0                      |
| 5         | Cu(OAc) <sub>2</sub>                    | TBHP                          | DCE                             | 10       | 0                      |
| 1         | FeCl <sub>2</sub> ·6H <sub>2</sub> O    | TBHP                          | DCE                             | 10       | 17                     |
| 2         | FeCl <sub>3</sub>                       | TBHP                          | DCE                             | 10       | trace                  |
| 6         | FeCl <sub>2</sub>                       | TBHP                          | DCE                             | 10       | 27                     |
| 7         | Fe(COO) <sub>2</sub> ·2H <sub>2</sub> O | TBHP                          | DCE                             | 10       | 46                     |
| 8         | Fe(COO) <sub>2</sub>                    | TBHP                          | DCE                             | 10       | 49                     |
| 9         | FeSO <sub>4</sub> ·5H <sub>2</sub> O    | TBHP                          | DCE                             | 10       | 41                     |
| 10        | Fe(OAc) <sub>2</sub>                    | TBHP                          | DCE                             | 10       | 0                      |
| 11        | Fe(acac) <sub>2</sub>                   | TBHP                          | DCE                             | 10       | 0                      |
| 12        | FeS                                     | TBHP                          | DCE                             | 10       | 0                      |
| 13        | NiCl <sub>2</sub> ·6H <sub>2</sub> O    | TBHP                          | DCE                             | 10       | 0                      |
| 14        | CoCl <sub>2</sub> ·6H <sub>2</sub> O    | TBHP                          | DCE                             | 10       | 0                      |
| 15        | Fe(COO) <sub>2</sub>                    | TBHP                          | DCE                             | 5        | 52                     |
| 16        | Fe(COO) <sub>2</sub>                    | TBHP                          | DCE                             | 4        | 60                     |
| 17        | Fe(COO) <sub>2</sub>                    | TBHP                          | DCE                             | 3        | 47                     |
| 18        | Fe(COO) <sub>2</sub>                    | DIB                           | DCE                             | 4        | 0                      |
| 19        | Fe(COO) <sub>2</sub>                    | Oxone                         | DCE                             | 4        | 0                      |
| 20        | Fe(COO) <sub>2</sub>                    | mCPBA                         | DCE                             | 4        | 0                      |
| 21        | Fe(COO) <sub>2</sub>                    | DDQ                           | DCE                             | 4        | 0                      |
| 22        | Fe(COO) <sub>2</sub>                    | NIS                           | DCE                             | 4        | 0                      |
| 23        | Fe(COO) <sub>2</sub>                    | F-TEDA                        | DCE                             | 4        | 0                      |
| 24        | Fe(COO) <sub>2</sub>                    | H <sub>2</sub> O <sub>2</sub> | DCE                             | 4        | 38                     |
| 25        | Fe(COO) <sub>2</sub>                    | TBHP                          | DCM                             | 4        | 59                     |
| 26        | Fe(COO) <sub>2</sub>                    | TBHP                          | CHCl <sub>3</sub>               | 4        | 56                     |
| <b>27</b> | <b>Fe(COO)<sub>2</sub></b>              | <b>TBHP</b>                   | <b>Toluene</b>                  | <b>4</b> | <b>63</b>              |
| 28        | Fe(COO) <sub>2</sub>                    | TBHP                          | THF                             | 4        | 0                      |
| 29        | Fe(COO) <sub>2</sub>                    | TBHP                          | CH <sub>3</sub> CN              | 4        | 0                      |
| 30        | Fe(COO) <sub>2</sub>                    | TBHP                          | Et <sub>2</sub> O               | 4        | 0                      |
| 31        | Fe(COO) <sub>2</sub>                    | TBHP                          | DMF                             | 4        | 0                      |
| 32        | Fe(COO) <sub>2</sub>                    | TBHP                          | 1,4-dioxane                     | 4        | 0                      |
| 33        | Fe(COO) <sub>2</sub>                    | TBHP                          | ethyl acetate                   | 4        | 0                      |
| 34        | Fe(COO) <sub>2</sub>                    | TBHP                          | DMSO                            | 4        | 0                      |
| 35        | Fe(COO) <sub>2</sub>                    | TBHP                          | acetone                         | 4        | 0                      |
| 36        | Fe(COO) <sub>2</sub>                    | TBHP                          | CH <sub>3</sub> NO <sub>2</sub> | 4        | 0                      |
| 37        | Fe(COO) <sub>2</sub>                    | TBHP                          | hexane                          | 4        | 30                     |

<sup>a</sup> Reaction conditions: 1,2,3,4-tetrahydroquinoline (0.5 mmol), EtOH (2.5 mmol), oxidant (1.5 mmol), catalyst (0.15 mmol), solvent (4 mL), rt. <sup>b</sup> Yield determined by <sup>1</sup>H NMR using mesitylene as internal

standard.

Different catalysts, oxidants, solvents and reaction time were screened, the highest yield was obtained when using Fe(COO)<sub>2</sub> as catalyst, TBHP as oxidant and toluene as solvent. The best reaction time was 4 h.

**Table 2S.** Optimization of Reaction Conditions<sup>a</sup>

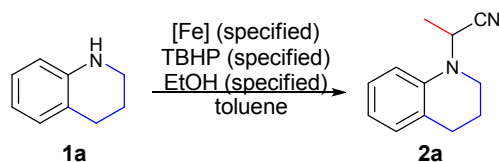

| Entry     | TBHP (eq) | EtOH (eq)  | TMSCN (eq) | [Fe] (eq)  | Yield (%) <sup>b</sup> |
|-----------|-----------|------------|------------|------------|------------------------|
| 1         | 2         | 5          | 3          | 0.3        | 47                     |
| 2         | 4         | 5          | 3          | 0.3        | 64                     |
| 3         | 5         | 5          | 3          | 0.3        | 62                     |
| 4         | 6         | 5          | 3          | 0.3        | 56                     |
| 5         | 3.5       | 5          | 3          | 0.3        | 56                     |
| 6         | 4.5       | 5          | 3          | 0.3        | 58                     |
| 7         | 4         | 3          | 3          | 0.3        | 55                     |
| 8         | 4         | 6          | 3          | 0.3        | 68                     |
| 9         | 4         | 7          | 3          | 0.3        | 71                     |
| 10        | 4         | 7.5        | 3          | 0.3        | 73                     |
| 11        | 4         | 8          | 3          | 0.3        | 73                     |
| 12        | 4         | 8.5        | 3          | 0.3        | 68                     |
| 13        | 4         | 9          | 3          | 0.3        | 67                     |
| 14        | 4         | 11         | 3          | 0.3        | 70                     |
| 15        | 4         | 7.5        | 2          | 0.3        | 71                     |
| 16        | 4         | 7.5        | 4          | 0.3        | 76                     |
| 17        | 4         | 7.5        | 5          | 0.3        | 70                     |
| 18        | 4         | 7.5        | 6          | 0.3        | 66                     |
| 19        | 4         | 7.5        | 3.5        | 0.3        | 73                     |
| 20        | 4         | 7.5        | 4.5        | 0.3        | 72                     |
| 21        | 4         | 7.5        | 4          | 0.2        | 74                     |
| 22        | 4         | 7.5        | 4          | 0.4        | 72                     |
| <b>23</b> | <b>4</b>  | <b>7.5</b> | <b>4</b>   | <b>0.1</b> | <b>76</b>              |
| 24        | 4         | 7.5        | 4          | 0.05       | 70                     |
| 25        | 4         | 7.5        | 4          | 0.02       | 53                     |
| 26        | 4         | 7.5        | 4          | 0.1        | 0 <sup>c</sup>         |
| 27        | 4         | 7.5        | 4          | 0.1        | 0 <sup>d</sup>         |
| 28        | 4         | 7.5        | 4          | 0.1        | Complex <sup>e</sup>   |

<sup>a</sup> Reaction conditions: 1,2,3,4-tetrahydroquinoline (0.5 mmol), oxidant (specified), EtOH (specified), TMSCN (specified), catalyst (specified), solvent (4 mL), 4 h, rt. <sup>b</sup> Yield determined by <sup>1</sup>H NMR using mesitylene as internal standard. <sup>c</sup> 0.2 eq K<sub>2</sub>CO<sub>3</sub> was added. <sup>d</sup> 0.2 wt% 4 Å M. S. was added. <sup>e</sup> 0.2 eq DBU was added. M. S. = molecular sieve.

Different amounts of TBHP, EtOH, TMSCN and iron salt were evaluated (Table 2S) and the highest yield was obtained when using 4 equivalents of TBHP, 7.5 equivalents of EtOH, 4

equivalents of TMSCN and 0.1 equivalent of iron salt.

**Figure 1S.**  $^1\text{H}$  NMR spectroscopic analysis of the intermediate aldehyde.

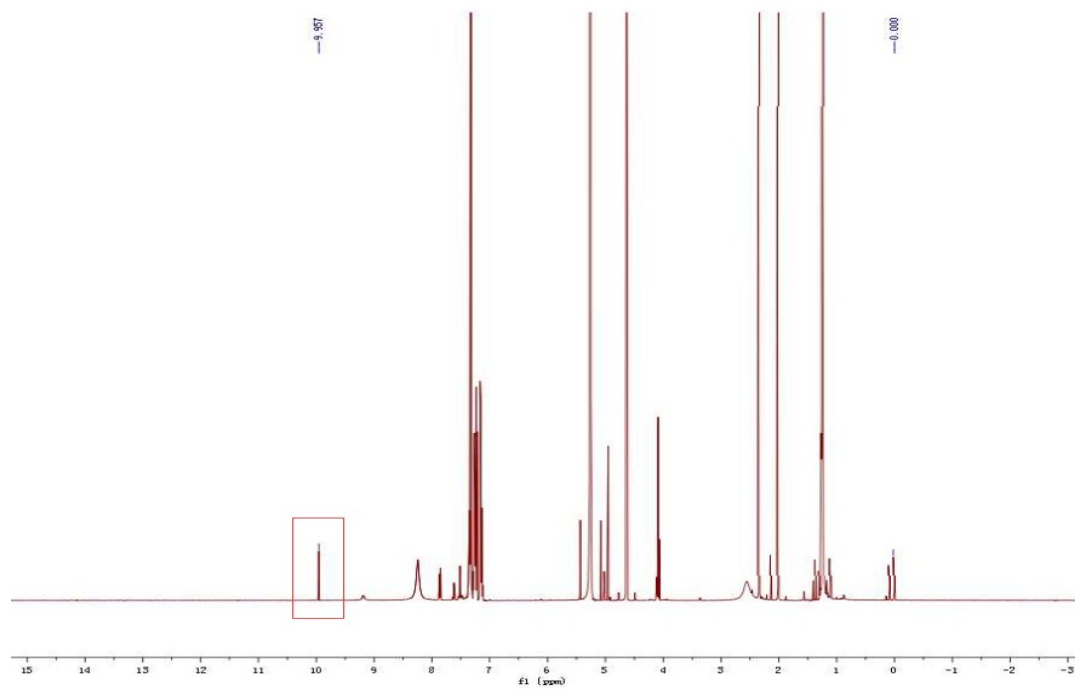

TBHP (0.3 mL, 2 mmol,  $\geq 65\%$  in *tert*-butanol) was added to the stirred mixture of benzyl alcohol (0.52 mL, 0.5 mmol) and ferrous oxalate (0.007 g, 0.05 mmol) in 4 mL toluene and rose to 90 °C for 5 h. Subsequently, the mixture was poured into aqueous  $\text{NaHCO}_3$  and  $\text{Na}_2\text{S}_2\text{O}_3$  solution, and extracted with ethyl acetate. The organic layer was washed with brine, dried over magnesium sulfate and concentrated in vacuo. The residue was analyzed by  $^1\text{H}$  NMR and the chemical shift of aldehyde group of benzaldehyde was the same as reported data.

#### 4. $^1\text{H}$ - and $^{13}\text{C}$ -NMR analytical data

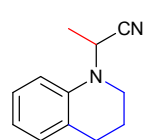

**2-(3,4-dihydroquinolin-1(2H)-yl)propanenitrile (2a):** Yellow oil; 70% yield.  $^1\text{H}$  NMR (500 MHz,  $\text{CDCl}_3$ )  $\delta$  7.12 (td,  $J = 8.0, 1.5$  Hz, 1H), 7.03 (d,  $J = 7.0$  Hz, 1H), 6.75 (td,  $J = 7.5, 0.5$  Hz, 1H), 6.71 (d,  $J = 8.0$  Hz, 1H), 4.83 (q,  $J = 7.0$  Hz, 1H), 3.35-3.31 (m, 1H), 3.26-3.21 (m, 1H), 2.82-2.71 (m, 2H), 2.03-1.98 (m, 2H), 1.62 (d,  $J = 7.5$  Hz, 3H).  $^{13}\text{C}$  NMR (125 MHz,  $\text{CDCl}_3$ )  $\delta$  143.6, 129.8, 127.4, 125.6, 119.1, 119.0, 112.1, 45.7, 43.9, 27.9, 22.3, 17.3. HRMS (ESI) calcd for  $\text{C}_{12}\text{H}_{14}\text{N}_2$  [ $\text{M}+\text{H}$ ] $^+$  187.1230, found 187.1221.

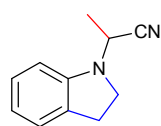

**2-(indolin-1-yl)propanenitrile (2b):** White solid; 69% yield; mp 78-79 °C.  $^1\text{H}$  NMR (500 MHz,  $\text{CDCl}_3$ )  $\delta$  7.15-7.12 (m, 2H), 6.82 (td,  $J = 8.0, 0.5$  Hz, 1H), 6.58 (d,  $J = 8.0$  Hz, 1H), 4.56 (q,  $J = 7.5$  Hz, 1H), 3.57 (td,  $J = 8.5, 3.5$  Hz, 1H), 3.23 (dt,  $J = 11, 8.5$  Hz, 1H), 3.05-2.99 (m, 2H), 1.63 (d,  $J = 7.0$  Hz, 3H).  $^{13}\text{C}$  NMR (125 MHz,  $\text{CDCl}_3$ )  $\delta$  149.3, 130.7, 127.6, 125.1, 120.6, 118.1, 108.6, 49.1, 45.0, 28.3, 17.8. HRMS (ESI) calcd for  $\text{C}_{11}\text{H}_{12}\text{N}_2$  [ $\text{M}+\text{H}$ ] $^+$  173.1073, found 173.1081.

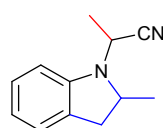

**2-(2-methylindolin-1-yl)propanenitrile (2c):** Yellow oil; mixture of two diastereoisomers (dr = 2:1); 94% yield. Major isomer:  $^1\text{H}$  NMR (500 MHz,  $\text{CDCl}_3$ )  $\delta$  7.13-7.08 (m, 2H), 6.78 (t,  $J = 7.5$  Hz, 1H), 6.62 (d,  $J = 7.5$  Hz, 1H), 4.37 (q,  $J = 7.5$  Hz, 1H), 3.87-3.81 (m, 1H), 3.16 (dd,  $J = 15.5, 8.5$  Hz, 1H), 2.64 (dd,  $J = 15.5, 7.5$  Hz, 1H). Two isomers:  $^{13}\text{C}$  NMR (125 MHz,  $\text{CDCl}_3$ )  $\delta$  149.1, 148.3, 129.7,

129.4, 127.62, 127.56, 125.01, 124.97, 120.3, 119.8, 119.2, 119.0, 109.7, 108.4, 58.9, 58.8, 45.4, 42.7, 37.8, 37.3, 22.2, 19.2, 18.1, 18.0. HRMS (ESI) calcd for C<sub>12</sub>H<sub>14</sub>N<sub>2</sub> [M+H]<sup>+</sup> 187.1230, found 187.1236.

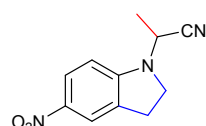

**2-(5-nitroindolin-1-yl)propanenitrile (2d):** Yellow solid; 76% yield; mp 109-112 °C. <sup>1</sup>H NMR (500 MHz, CDCl<sub>3</sub>) δ 7.73 (dd, *J* = 8.0, 2.0 Hz, 1H), 7.37 (d, *J* = 2.0 Hz, 1H), 7.23 (d, *J* = 8.0 Hz, 1H), 4.63 (q, *J* = 7.0 Hz, 1H), 7.34-3.70 (m, 1H), 3.42 (dt, *J* = 11.0, 9.0 Hz, 1H), 3.19-3.06 (m, 2H), 1.68 (d, *J* = 7.5 Hz, 3H). <sup>13</sup>C NMR (125 MHz, CDCl<sub>3</sub>) δ 150.4, 148.6, 138.3, 125.0, 117.4, 116.5, 102.9, 49.3, 44.6, 28.3, 17.6. HRMS (ESI) calcd for C<sub>11</sub>H<sub>11</sub>N<sub>3</sub>O<sub>2</sub> [M+H]<sup>+</sup> 218.0924, found 218.0930.

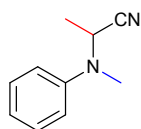

**2-(methyl(phenyl)amino)propanenitrile (2e):**<sup>2</sup> Yellow oil; 60% yield. <sup>1</sup>H NMR (500 MHz, CDCl<sub>3</sub>) δ 7.30 (t, *J* = 8.0 Hz, 2H), 6.96-6.93 (m, 3H), 4.62 (q, *J* = 7.5 Hz, 1H), 2.90 (s, 3H), 1.59 (d, *J* = 7.5 Hz, 3H). <sup>13</sup>C NMR (125 MHz, CDCl<sub>3</sub>) δ 149.1, 129.5, 121.3, 118.6, 117.2, 49.2, 34.5, 18.1. HRMS (ESI) calcd for C<sub>10</sub>H<sub>12</sub>N<sub>2</sub> [M+H]<sup>+</sup> 161.1073, found 161.1068.

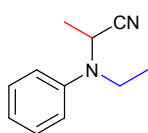

**2-(ethyl(phenyl)amino)propanenitrile (2f):**<sup>3</sup> Yellow oil; 42% yield. <sup>1</sup>H NMR (500 MHz, CDCl<sub>3</sub>) δ 7.31 (td, *J* = 7.0, 2.0 Hz, 2H), 7.00-6.97 (m, 3H), 4.47 (q, *J* = 7.0 Hz, 1H), 3.38-3.32 (m, 2H), 1.56 (d, *J* = 7.0 Hz, 3H), 1.18 (t, *J* = 7.0 Hz, 3H). <sup>13</sup>C NMR (125 MHz, CDCl<sub>3</sub>) δ 147.0, 129.5, 121.9, 119.6, 119.2, 48.4, 43.8, 18.7, 14.0. HRMS (ESI) calcd for C<sub>11</sub>H<sub>14</sub>N<sub>2</sub> [M+H]<sup>+</sup> 175.1230, found 175.1234.

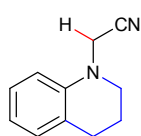

**2-(3,4-dihydroquinolin-1(2H)-yl)acetonitrile (2g):** Yellow solid; 45% yield; mp 59-62 °C. <sup>1</sup>H NMR (500 MHz, CDCl<sub>3</sub>) δ 7.14 (td, *J* = 8.0, 1.0 Hz, 1H), 7.03 (d, *J* = 7.0 Hz, 1H), 6.78 (t, *J* = 7.0 Hz, 1H), 6.67 (d, *J* = 8.5 Hz, 1H), 4.16 (s, 2H), 3.29 (t, *J* = 6.0 Hz, 2H), 2.79 (t, *J* = 6.5 Hz, 2H), 2.07-2.02 (m, 2H). <sup>13</sup>C NMR (125 MHz, CDCl<sub>3</sub>) δ 143.3, 129.8, 127.5, 124.8, 119.4, 116.0, 112.0, 50.2, 40.4, 27.5, 22.4. HRMS (ESI) calcd for C<sub>11</sub>H<sub>12</sub>N<sub>2</sub> [M+H]<sup>+</sup> 173.1073, found 173.1082.

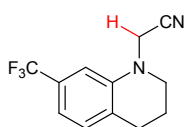

**2-(7-(trifluoromethyl)-3,4-dihydroquinolin-1(2H)-yl)acetonitrile (2h):** Yellow oil; 30% yield. <sup>1</sup>H NMR (500 MHz, CDCl<sub>3</sub>) δ 7.11 (d, *J* = 8.0 Hz, 1H), 7.01 (d, *J* = 7.5 Hz, 1H), 6.83 (s, 1H), 4.20 (s, 2H), 3.35 (t, *J* = 6.0 Hz, 2H), 2.83 (t, *J* = 6.5 Hz, 2H), 2.08-2.03 (m, 2H). <sup>13</sup>C NMR (125 MHz, CDCl<sub>3</sub>) δ 143.6, 130.0, 129.9 (q, *J* = 32.5 Hz), 128.5, 124.4 (q, *J* = 270 Hz), 115.9 (q, *J* = 3.8 Hz), 115.4, 108.3 (q, *J* = 3.8 Hz), 50.0, 40.2, 27.5, 21.9. HRMS (ESI) calcd for C<sub>12</sub>H<sub>11</sub>N<sub>2</sub>F<sub>3</sub> [M+H]<sup>+</sup> 241.0947, found 241.0935.

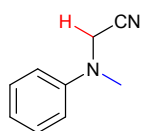

**N-methyl-N-phenylaminoacetonitrile (2i):**<sup>2</sup> Yellow oil; 44% yield. <sup>1</sup>H NMR (500 MHz, CDCl<sub>3</sub>) δ 7.32 (t, *J* = 7.5 Hz, 2H), 6.93 (t, *J* = 7.0 Hz, 1H), 6.87 (d, *J* = 8.0 Hz, 2H), 4.18 (s, 2H), 3.01 (s, 3H). <sup>13</sup>C NMR (125 MHz, CDCl<sub>3</sub>) δ 148.0, 129.6, 120.4, 115.7, 115.1, 42.5, 39.4. HRMS (ESI) calcd for C<sub>9</sub>H<sub>10</sub>N<sub>2</sub> [M+H]<sup>+</sup> 147.0917, found 147.0915.

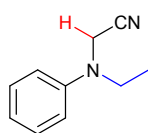

**N-ethyl-N-phenylaminoacetonitrile (2j):**<sup>3</sup> Yellow oil; 51% yield. <sup>1</sup>H NMR (500 MHz, CDCl<sub>3</sub>) δ 7.31 (td, *J* = 7.5, 1.0 Hz, 2H), 6.90 (t, *J* = 7.5 Hz, 1H), 6.86 (d, *J* = 8.0 Hz, 2H), 4.14 (s, 2H), 3.44 (q, *J* = 7.0 Hz, 2H), 1.25 (t, *J* = 7.5 Hz, 3H). <sup>13</sup>C NMR (125 MHz, CDCl<sub>3</sub>) δ 147.0, 129.7, 120.0, 116.5, 115.1, 46.5, 39.7, 12.4. HRMS (ESI) calcd for C<sub>10</sub>H<sub>12</sub>N<sub>2</sub> [M+H]<sup>+</sup> 161.1073, found 161.1066.

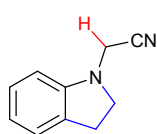

**2-(indolin-1-yl)acetonitrile (2k):** Yellow oil; 44% yield. <sup>1</sup>H NMR (500 MHz, CDCl<sub>3</sub>) δ 7.16-7.13 (m, 2H), 6.83 (t, *J* = 7.0 Hz, 1H), 6.58 (d, *J* = 8.0 Hz, 1H),

4.07 (s, 2H), 3.43 (t,  $J = 8.0$  Hz, 2H), 3.03 (t,  $J = 8.0$  Hz, 2H).  $^{13}\text{C}$  NMR (125 MHz,  $\text{CDCl}_3$ )  $\delta$  149.4, 130.6, 127.7, 125.1, 120.5, 115.1, 108.3, 53.7, 37.7, 28.7. HRMS (ESI) calcd for  $\text{C}_{10}\text{H}_{10}\text{N}_2$   $[\text{M}+\text{H}]^+$  159.0917, found 159.0921.

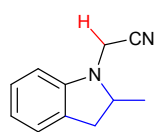

**2-(2-methylindolin-1-yl)acetonitrile (2l):** Yellow oil; 39% yield.  $^1\text{H}$  NMR (500 MHz,  $\text{CDCl}_3$ )  $\delta$  7.14 (t,  $J = 7.5$  Hz, 1H), 7.11 (d,  $J = 7.5$  Hz, 1H), 6.82 (td,  $J = 7.5$ , 0.5 Hz, 1H), 6.55 (d,  $J = 8.0$  Hz, 1H), 4.20 (d,  $J = 18.0$  Hz, 1H), 3.96 (d,  $J = 18.0$  Hz, 1H), 3.70-3.65 (m, 1H), 3.17 (dd,  $J = 15.0$ , 8.0 Hz, 1H), 2.67 (dd,  $J = 15.5$ , 10.5 Hz, 1H), 1.38 (d,  $J = 6.0$  Hz, 3H).  $^{13}\text{C}$  NMR (125 MHz,  $\text{CDCl}_3$ )  $\delta$  149.6, 129.6, 127.7, 124.8, 120.6, 115.2, 108.3, 60.7, 37.3, 35.2, 18.5. HRMS (ESI) calcd for  $\text{C}_{11}\text{H}_{12}\text{N}_2$   $[\text{M}+\text{H}]^+$  173.1073, found 173.1078.

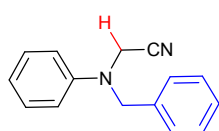

**N-benzyl-N-phenylaminoacetonitrile (2m):**<sup>4</sup> Yellow oil; 26% yield.  $^1\text{H}$  NMR (500 MHz,  $\text{CDCl}_3$ )  $\delta$  7.39-7.31 (m, 7H), 6.98-6.94 (m, 3H), 4.52 (s, 2H), 4.07 (s, 2H).  $^{13}\text{C}$  NMR (125 MHz,  $\text{CDCl}_3$ )  $\delta$  148.1, 137.0, 129.7, 129.1, 128.0, 127.8, 120.9, 116.0, 115.8, 55.9, 39.7. HRMS (ESI) calcd for  $\text{C}_{15}\text{H}_{14}\text{N}_2$   $[\text{M}+\text{H}]^+$  223.1230, found 223.1235.

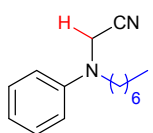

**N-heptyl-N-phenylaminoacetonitrile (2n):** Yellow oil; 21% yield.  $^1\text{H}$  NMR (500 MHz,  $\text{CDCl}_3$ )  $\delta$  7.30 (td,  $J = 7.5$ , 1.0 Hz, 2H), 6.89 (t,  $J = 7.5$  Hz, 1H), 6.85 (d,  $J = 8.0$  Hz, 2H), 4.14 (s, 2H), 3.33 (t,  $J = 8.0$  Hz, 2H), 1.66-1.63 (m, 2H), 1.35-1.28 (m, 8H), 0.89 (t,  $J = 7.5$  Hz, 3H).  $^{13}\text{C}$  NMR (125 MHz,  $\text{CDCl}_3$ )  $\delta$  147.4, 129.7, 119.9, 116.5, 114.9, 52.3, 40.2, 32.0, 29.2, 27.4, 27.2, 22.8, 14.2. HRMS (ESI) calcd for  $\text{C}_{15}\text{H}_{22}\text{N}_2$   $[\text{M}+\text{H}]^+$  231.1856, found 231.1849.

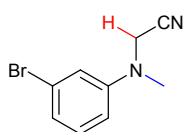

**N-(3-bromophenyl)-N-methylaminoacetonitrile (2o):**<sup>5</sup> Yellow oil; 49% yield.  $^1\text{H}$  NMR (500 MHz,  $\text{CDCl}_3$ )  $\delta$  7.16 (t,  $J = 8.0$  Hz, 1H), 7.03 (d,  $J = 8.0$  Hz, 1H), 6.98 (t,  $J = 2.0$  Hz, 1H), 6.76 (dd,  $J = 8.4$ , 2.4 Hz, 1H), 4.16 (s, 2H), 3.01 (s, 3H).  $^{13}\text{C}$  NMR (125 MHz,  $\text{CDCl}_3$ )  $\delta$  149.1, 130.9, 123.7, 123.1, 117.8, 115.3, 113.3, 42.1, 39.4. HRMS (ESI) calcd for  $\text{C}_9\text{H}_9\text{BrN}_2$   $[\text{M}+\text{H}]^+$  225.0022, found 225.0016.

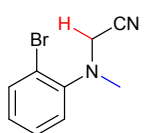

**N-(2-bromophenyl)-N-methylaminoacetonitrile (2p):**<sup>6</sup> Yellow solid; 30% yield; mp 37-39 °C.  $^1\text{H}$  NMR (500 MHz,  $\text{CDCl}_3$ )  $\delta$  7.59 (dd,  $J = 8.0$ , 1.0 Hz, 1H), 7.34 (td,  $J = 8.5$ , 1.5 Hz, 1H), 7.28 (dd,  $J = 8.0$ , 1.5 Hz, 1H), 7.03 (td,  $J = 7.5$ , 1.5 Hz, 1H), 4.09 (s, 2H), 2.94 (s, 3H).  $^{13}\text{C}$  NMR (125 MHz,  $\text{CDCl}_3$ )  $\delta$  147.6, 134.2, 128.8, 126.5, 123.0, 119.9, 115.3, 45.0, 40.8. HRMS (ESI) calcd for  $\text{C}_9\text{H}_9\text{BrN}_2$   $[\text{M}+\text{H}]^+$  225.0022, found 225.0017.

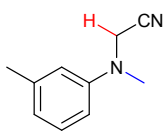

**N-Methyl-N-(3-methylphenyl)aminoacetonitrile (2q):**<sup>6</sup> Yellow oil; 39% yield.  $^1\text{H}$  NMR (500 MHz,  $\text{CDCl}_3$ )  $\delta$  7.21-7.18 (m, 1H), 6.74 (d,  $J = 7.5$  Hz, 1H), 6.68-6.67 (m, 2H), 4.15 (s, 2H), 2.99 (s, 3H), 2.34 (s, 3H).  $^{13}\text{C}$  NMR (125 MHz,  $\text{CDCl}_3$ )  $\delta$  146.3, 137.7, 127.8, 119.6, 114.2, 114.0, 110.6, 40.8, 37.7, 20.2. HRMS (ESI) calcd for  $\text{C}_{10}\text{H}_{12}\text{N}_2$   $[\text{M}+\text{H}]^+$  161.1073, found 161.1075.

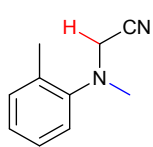

**N-Methyl-N-(2-methylphenyl)aminoacetonitrile (2r):**<sup>6</sup> Yellow oil; 60% yield.  $^1\text{H}$  NMR (500 MHz,  $\text{CDCl}_3$ )  $\delta$  7.23-7.19 (m, 3H), 7.09-7.05 (m, 1H), 3.85 (s, 2H), 2.86 (s, 3H), 2.30 (s, 3H).  $^{13}\text{C}$  NMR (125 MHz,  $\text{CDCl}_3$ )  $\delta$  148.7, 133.0, 131.5, 127.1, 125.2, 120.9, 115.8, 45.2, 41.2, 17.9. HRMS (ESI) calcd for  $\text{C}_{10}\text{H}_{12}\text{N}_2$   $[\text{M}+\text{H}]^+$  161.1073, found 161.1079.

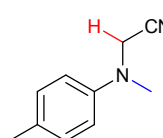

**N-Methyl-N-(4-methylphenyl)aminoacetonitrile (2s):**<sup>6</sup> Yellow oil; 36% yield.  $^1\text{H}$  NMR (500 MHz,  $\text{CDCl}_3$ )  $\delta$  7.13 (d,  $J = 8.5$  Hz, 2H), 6.80 (d,  $J = 8.5$  Hz, 2H),

4.14 (s, 2H), 2.97 (s, 3H), 2.29 (s, 3H).  $^{13}\text{C}$  NMR (125 MHz,  $\text{CDCl}_3$ )  $\delta$  145.9, 130.2, 130.1, 115.7, 115.6, 43.1, 39.7, 20.6. HRMS (ESI) calcd for  $\text{C}_{10}\text{H}_{12}\text{N}_2$   $[\text{M}+\text{H}]^+$  161.1073, found 161.1070.

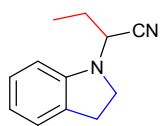

**2-(indolin-1-yl)butanenitrile (2t):** Yellow solid; 38% yield; mp 85-87 °C.  $^1\text{H}$  NMR (500 MHz,  $\text{CDCl}_3$ )  $\delta$  7.14-7.11 (m, 2H), 6.80 (td,  $J = 7.5, 0.5$  Hz, 1H), 6.57 (d,  $J = 8.0$  Hz, 1H), 4.30 (t,  $J = 8.0$  Hz, 1H), 3.53 (td,  $J = 9.0, 3.5$  Hz, 1H), 3.24 (tt,  $J = 11.0, 8.5$  Hz, 1H), 3.05-2.99 (m, 2H), 2.00-1.93 (m, 2H), 1.16 (t,  $J = 7.5$  Hz, 3H).  $^{13}\text{C}$  NMR (125 MHz,  $\text{CDCl}_3$ )  $\delta$  149.6, 130.5, 127.6, 125.1, 120.4, 117.6, 108.4, 51.8, 49.2, 28.4, 25.4, 10.8. HRMS (ESI) calcd for  $\text{C}_{12}\text{H}_{14}\text{N}_2$   $[\text{M}+\text{H}]^+$  187.1230, found 187.1233.

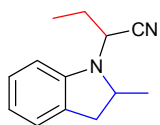

**2-(2-methylindolin-1-yl)butanenitrile (2u):** Major isomer: Yellow oil; 41% yield.  $^1\text{H}$  NMR (500 MHz,  $\text{CDCl}_3$ )  $\delta$  7.12-7.09 (m, 2H), 6.77 (td,  $J = 7.0, 0.5$  Hz, 1H), 6.62 (d,  $J = 8.0$  Hz, 1H), 4.05 (t,  $J = 8.0$  Hz, 1H), 3.83-3.78 (m, 1H), 3.16 (dd,  $J = 15.5, 8.5$  Hz, 1H), 2.65 (dd,  $J = 15.5, 8.0$  Hz, 1H), 2.15-2.03 (m, 2H), 1.35 (d,  $J = 6.0$  Hz, 3H), 1.14 (t,  $J = 7.5$  Hz, 3H).  $^{13}\text{C}$  NMR (125 MHz,  $\text{CDCl}_3$ )  $\delta$  148.6, 129.3, 127.5, 124.9, 119.7, 118.4, 108.5, 59.5, 49.9, 37.3, 25.5, 19.3, 11.2. HRMS (ESI) calcd for  $\text{C}_{13}\text{H}_{16}\text{N}_2$   $[\text{M}+\text{H}]^+$  201.1386, found 201.1380.

Minor isomer: Yellow oil; 21% yield.  $^1\text{H}$  NMR (500 MHz,  $\text{CDCl}_3$ )  $\delta$  7.12-7.08 (m, 2H), 6.78 (td,  $J = 7.5, 1.0$  Hz, 1H), 6.61 (d,  $J = 7.5$  Hz, 1H), 4.20 (dd,  $J = 9.0, 7.5$  Hz, 1H), 3.92-3.86 (m, 1H), 3.32 (dd,  $J = 16.0, 9.0$  Hz, 1H), 2.63 (dd,  $J = 16.0, 8.0$  Hz, 1H), 2.06-1.93 (m, 2H), 1.36 (d,  $J = 6.0$  Hz, 3H), 1.15 (t,  $J = 7.0$  Hz, 3H).  $^{13}\text{C}$  NMR (125 MHz,  $\text{CDCl}_3$ )  $\delta$  149.5, 129.6, 127.6, 125.0, 120.1, 118.1, 109.2, 59.4, 52.8, 37.8, 26.2, 22.1, 11.0. HRMS (ESI) calcd for  $\text{C}_{13}\text{H}_{16}\text{N}_2$   $[\text{M}+\text{H}]^+$  201.1386, found 201.1378.

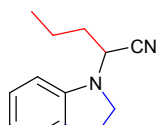

**2-(indolin-1-yl)pentanenitrile (2v):** Yellow solid; 18% yield; mp 89-91 °C.  $^1\text{H}$  NMR (500 MHz,  $\text{CDCl}_3$ )  $\delta$  7.14-7.11 (m, 2H), 6.80 (td,  $J = 7.5, 1.0$  Hz, 1H), 6.57 (d,  $J = 8.0$  Hz, 1H), 4.40 (t,  $J = 8.0$  Hz, 1H), 3.53 (td,  $J = 8.5, 3.0$  Hz, 1H), 3.24 (tt,  $J = 11.0, 8.5$  Hz, 1H), 3.05-2.99 (m, 2H), 1.94-1.89 (m, 2H), 1.62-1.57 (m, 2H), 1.02 (t,  $J = 7.5$  Hz, 3H).  $^{13}\text{C}$  NMR (125 MHz,  $\text{CDCl}_3$ )  $\delta$  149.6, 130.5, 127.6, 125.1, 120.4, 117.7, 108.4, 49.8, 49.3, 33.7, 28.4, 19.4, 13.5. HRMS (ESI) calcd for  $\text{C}_{13}\text{H}_{16}\text{N}_2$   $[\text{M}+\text{H}]^+$  201.1386, found 201.1384.

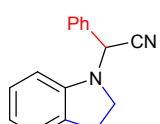

**2-(indolin-1-yl)-2-phenylacetone nitrile (2w):** White solid; 18% yield; mp 94-96 °C.  $^1\text{H}$  NMR (500 MHz,  $\text{CDCl}_3$ )  $\delta$  7.61 (d,  $J = 7.0$  Hz, 2H), 7.47-7.42 (m, 3H), 7.17-7.13 (m, 2H), 6.85 (t,  $J = 7.5$  Hz, 1H), 6.65 (d,  $J = 7.5$  Hz, 1H), 5.76 (s, 1H), 3.30-3.19 (m, 2H), 3.05-2.92 (m, 2H).  $^{13}\text{C}$  NMR (125 MHz,  $\text{CDCl}_3$ )  $\delta$  149.3, 132.8, 130.9, 129.32, 129.25, 127.62, 127.60, 125.3, 120.8, 116.0, 108.8, 54.5, 50.5, 28.3. HRMS (ESI) calcd for  $\text{C}_{16}\text{H}_{14}\text{N}_2$   $[\text{M}+\text{H}]^+$  235.1230, found 235.1234.

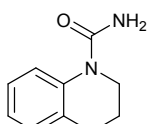

**3,4-dihydroquinoline-1(2H)-carboxamide (3):** Brown solid; 30% yield; mp 145-147 °C.  $^1\text{H}$  NMR (500 MHz,  $\text{CDCl}_3$ )  $\delta$  7.38 (d,  $J = 8.0$  Hz, 1H), 7.20-7.16 (m, 2H), 7.07 (t,  $J = 7.5$  Hz, 1H), 5.04 (br s, 2H), 3.76 (t,  $J = 6.5$  Hz, 2H), 2.76 (t,  $J = 6.5$  Hz, 2H), 1.98-1.92 (m, 2H).  $^{13}\text{C}$  NMR (125 MHz,  $\text{CDCl}_3$ )  $\delta$  157.5, 139.5, 132.7, 129.5, 126.8, 124.7, 123.3, 43.6, 27.2, 24.1. HRMS (ESI) calcd for  $\text{C}_{10}\text{H}_{12}\text{N}_2\text{O}$   $[\text{M}+\text{H}]^+$  177.1023, found 177.1018.

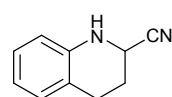

**1,2,3,4-tetrahydroquinoline-2-carbonitrile (4):**<sup>7</sup> Yellow oil.  $^1\text{H}$  NMR (500 MHz,  $\text{CDCl}_3$ )  $\delta$  7.05-7.01 (m, 2H), 6.76 (td,  $J = 7.5, 1.0$  Hz, 1H), 6.55 (d,  $J = 7.5$  Hz, 1H), 4.44-4.42 (m, 1H), 4.14 (s, 1H), 3.09 (ddd,  $J = 17.0, 11.5, 6.0$  Hz, 1H), 2.82 (dt,  $J = 17.0, 4.5$  Hz, 1H), 2.27-2.17 (m, 2H).  $^{13}\text{C}$  NMR (125 MHz,  $\text{CDCl}_3$ )  $\delta$  140.9, 129.7,





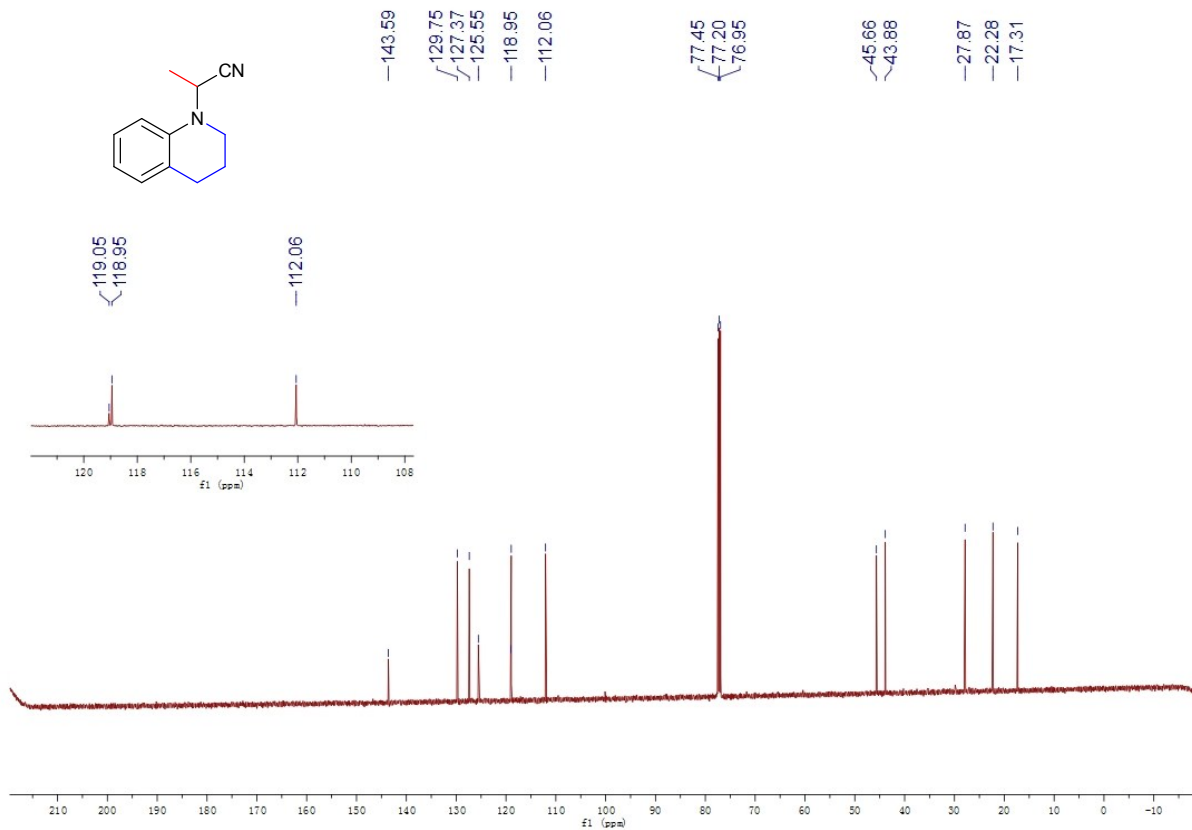

**2-(indolin-1-yl)propanenitrile (2d)**

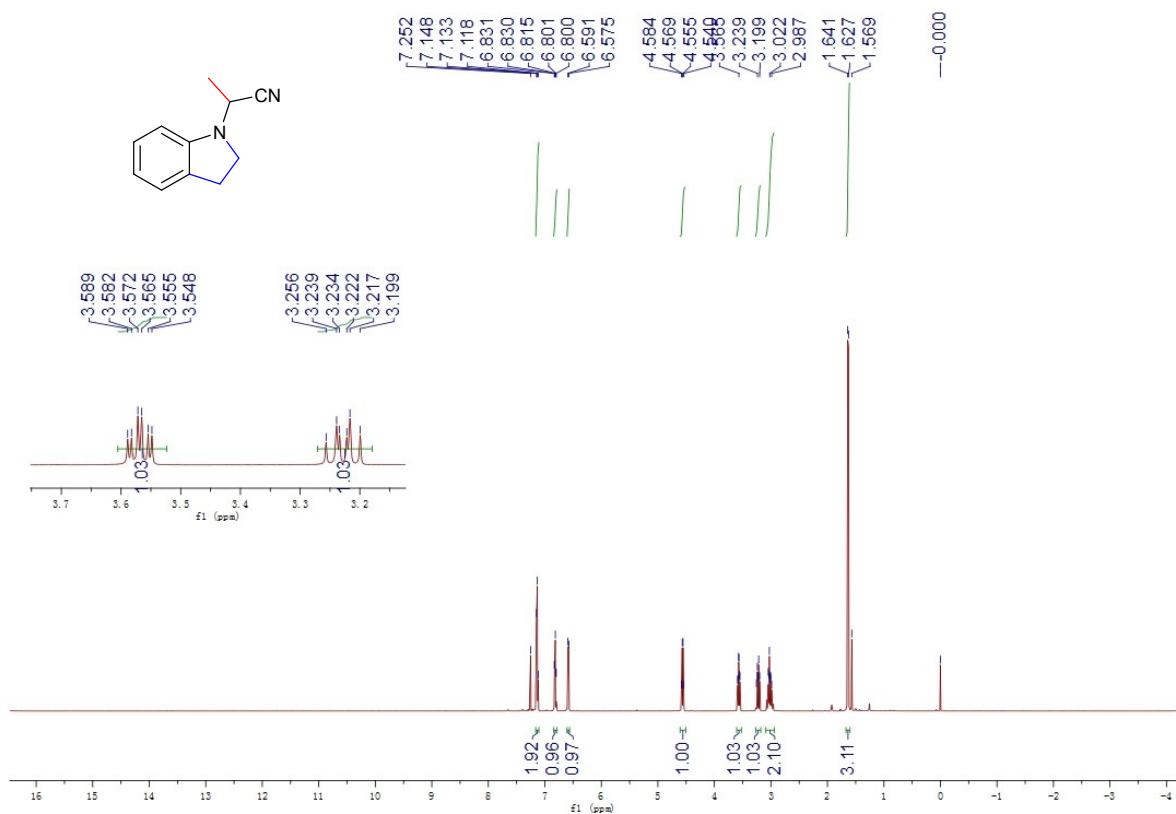

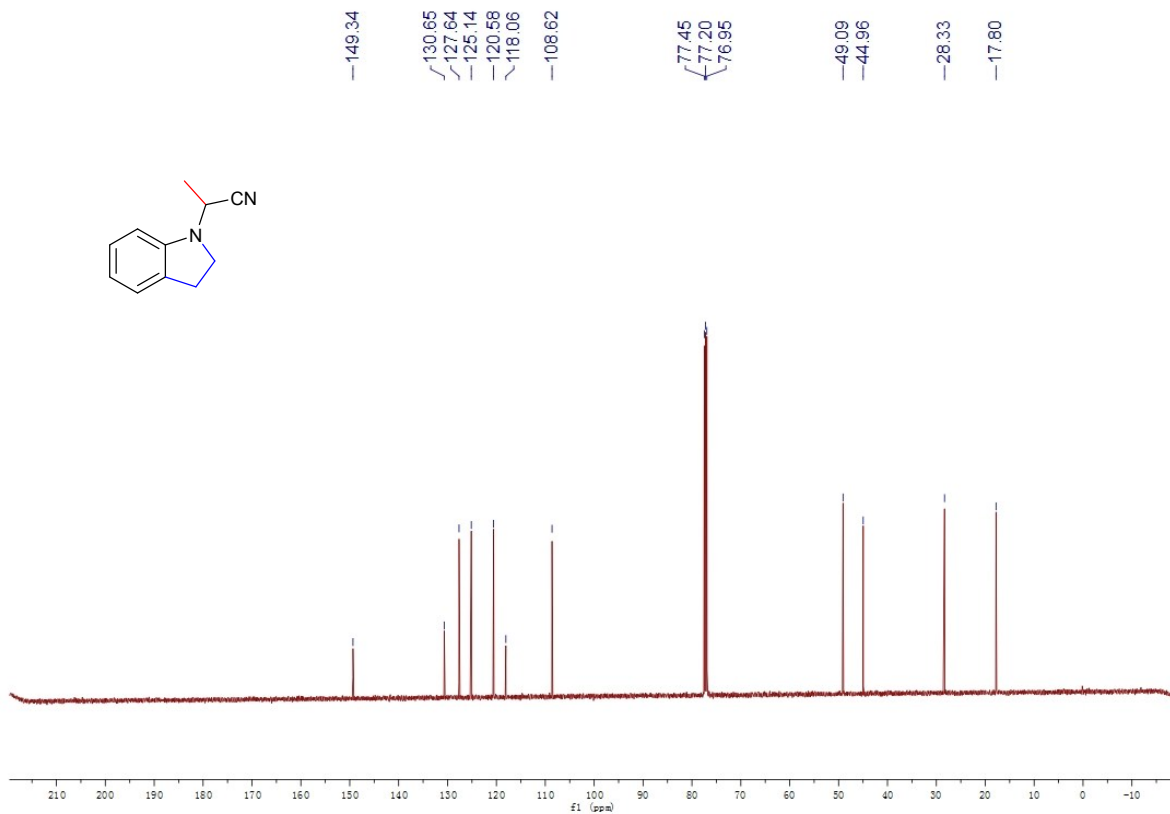

**2-(2-methylindolin-1-yl)propanenitrile (2c) mixture of two diastereoisomers (dr = 2:1)**

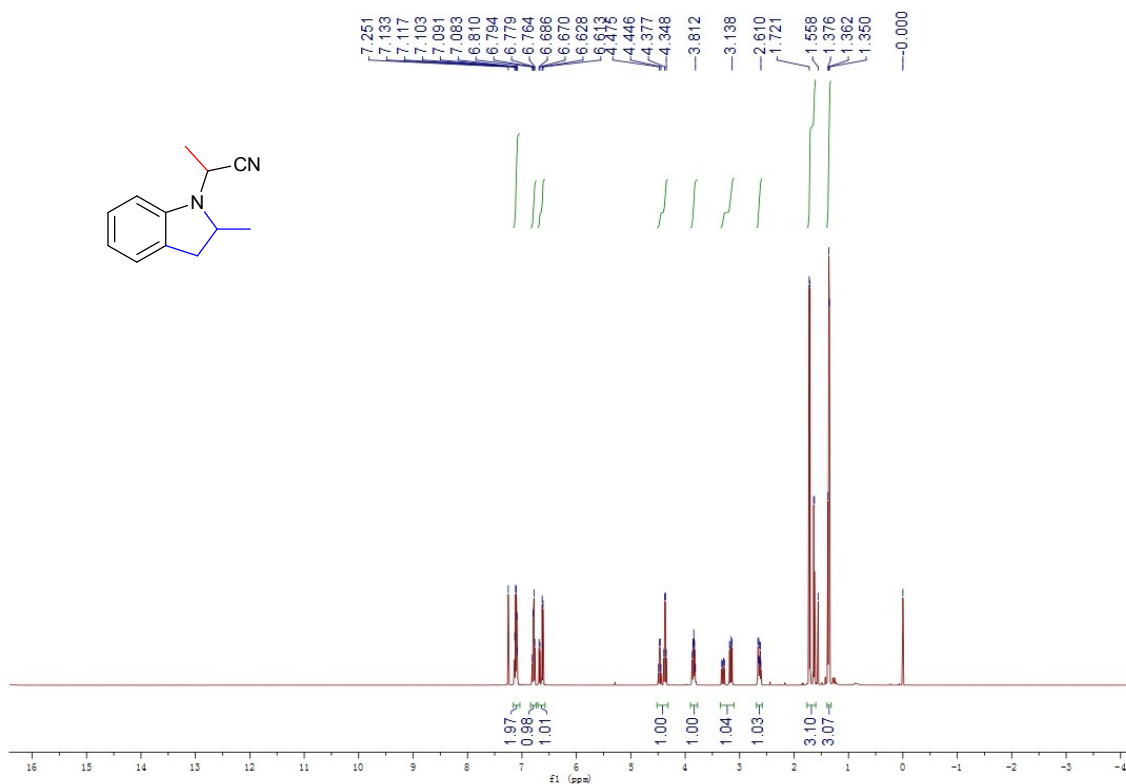

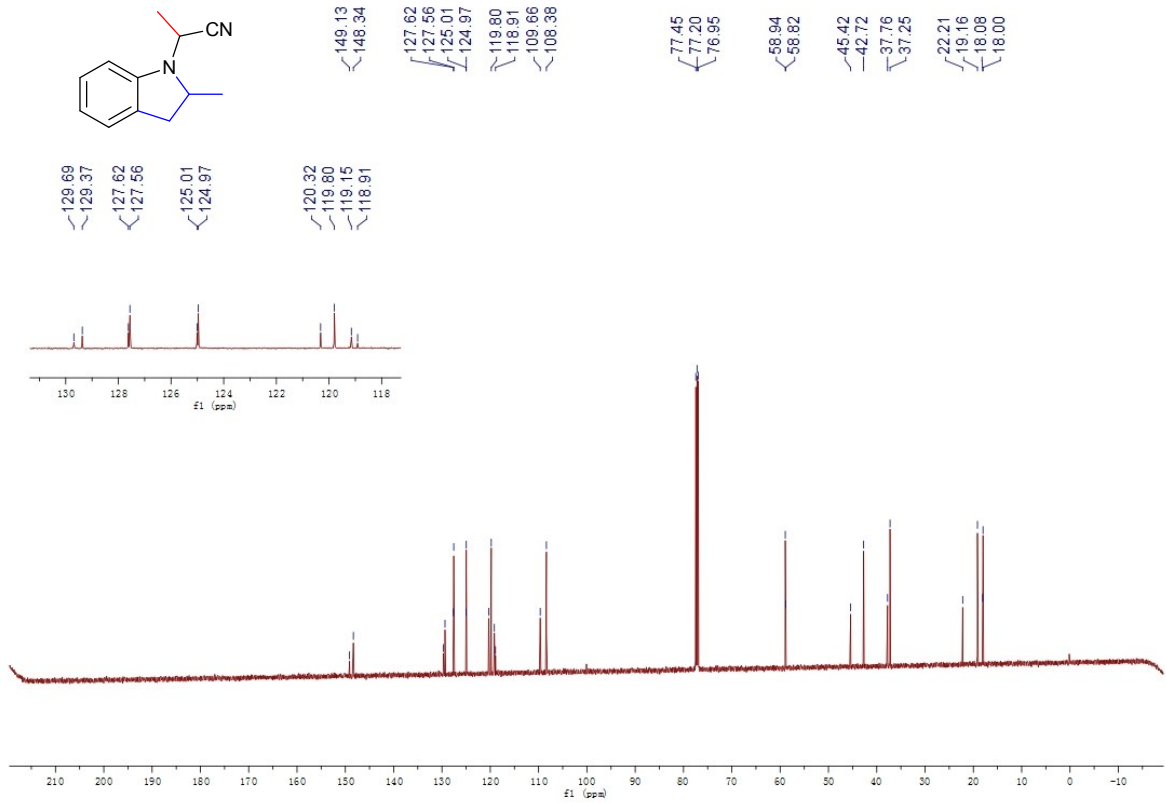

### 2-(5-nitroindolin-1-yl)propanenitrile (2d)

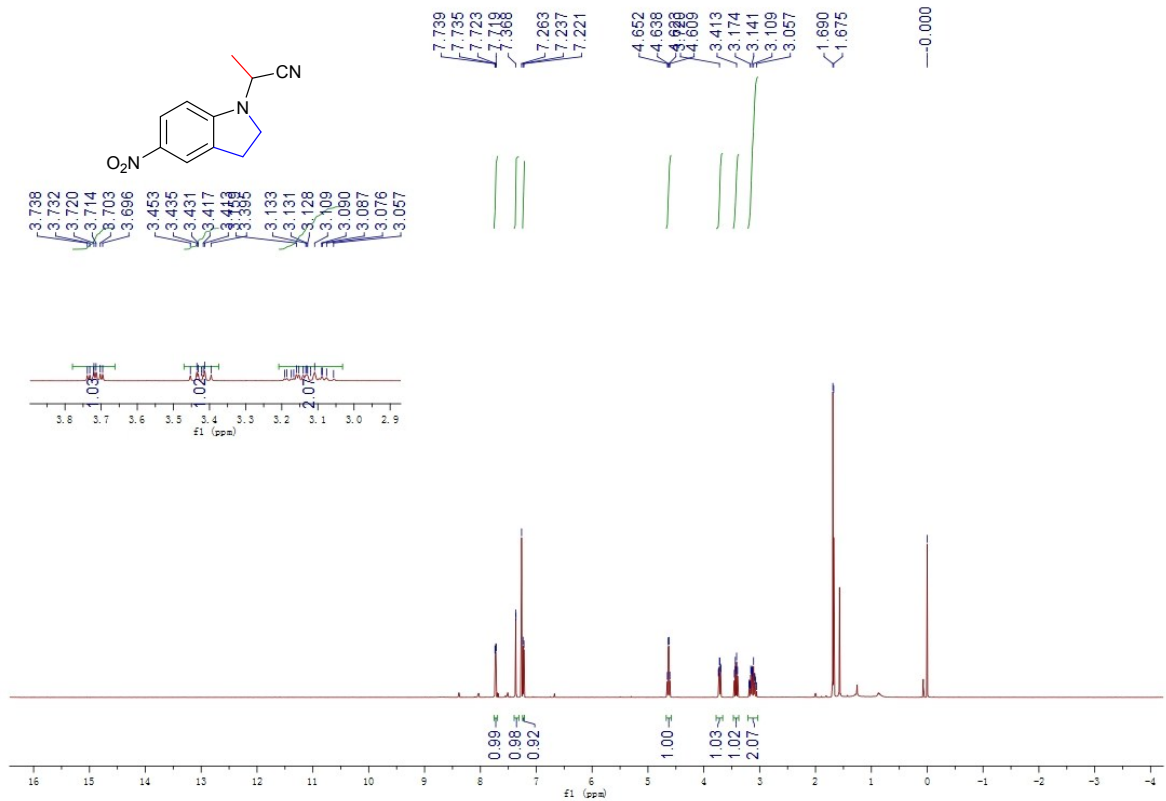

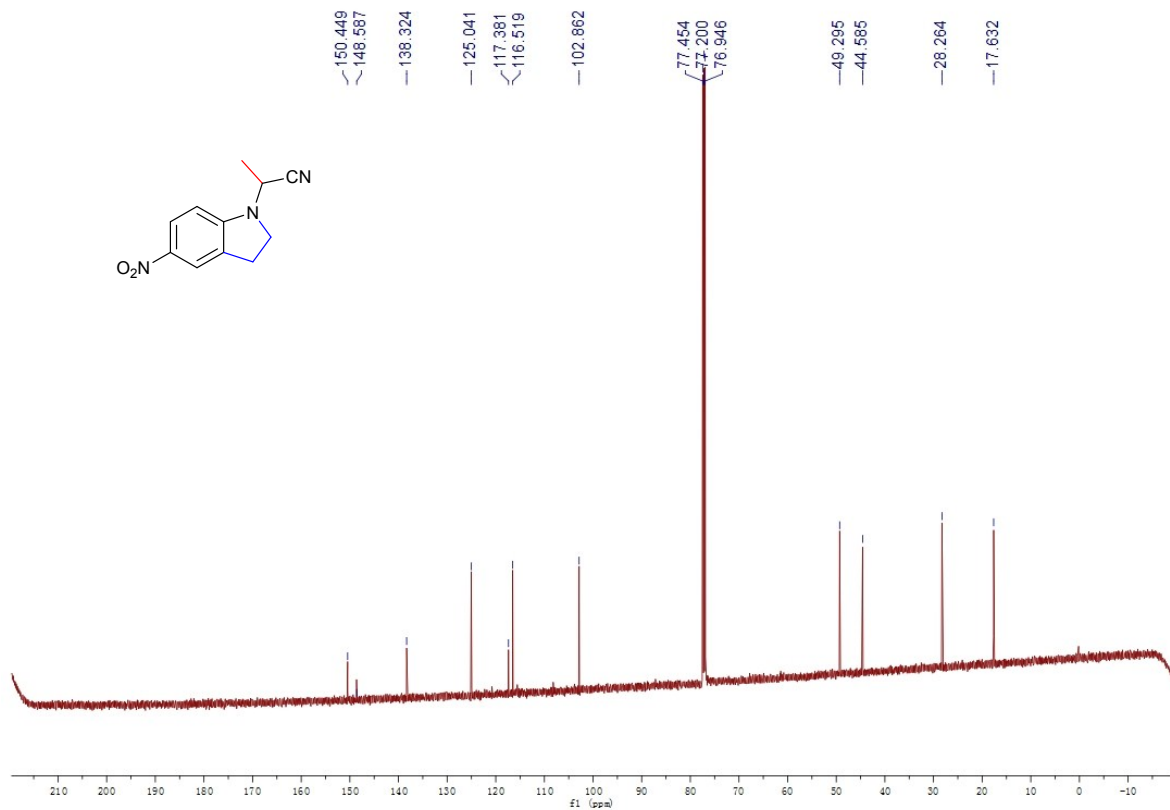

**2-(methyl(phenyl)amino)propanenitrile (2e)**

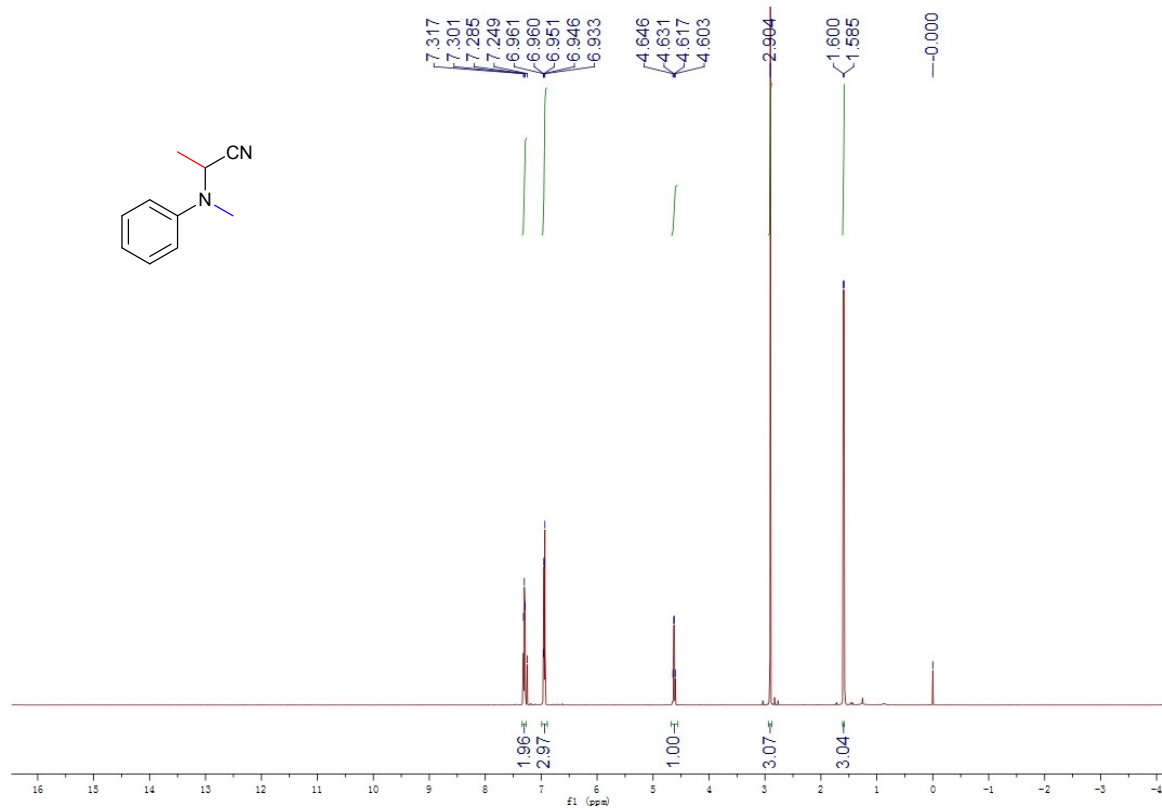

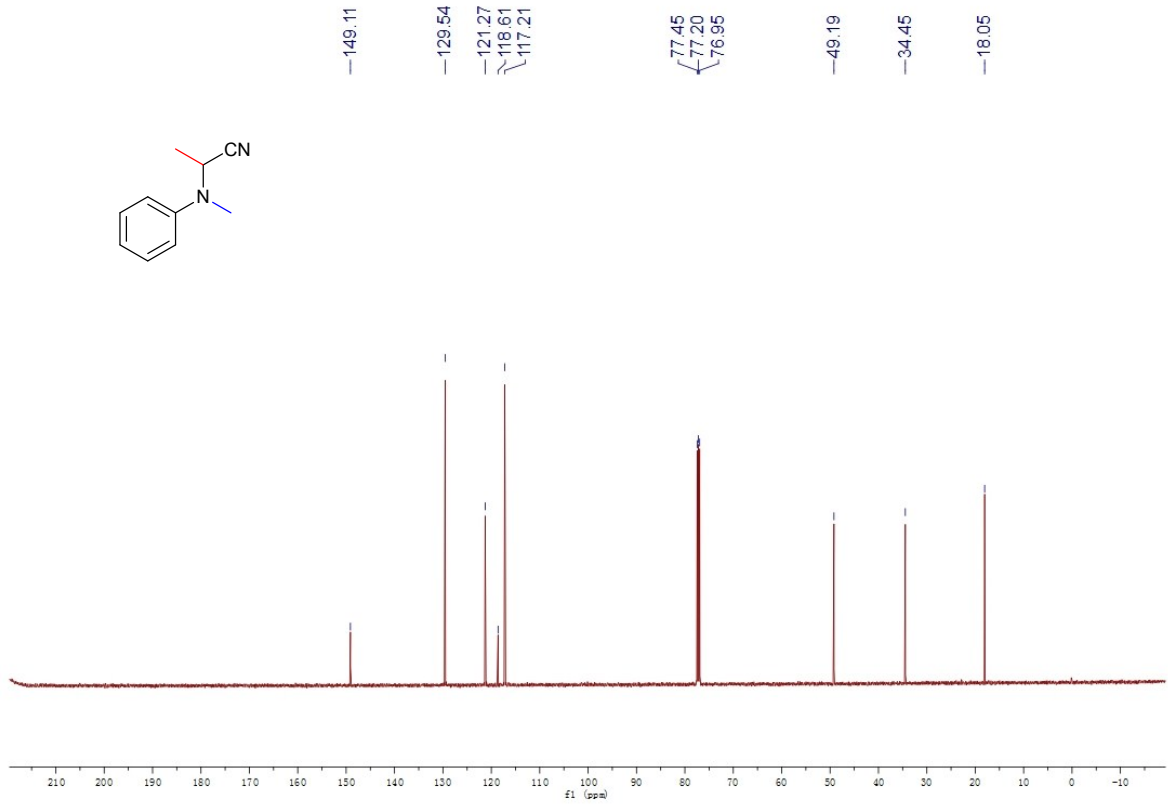

**2-(ethyl(phenyl)amino)propanenitrile (2f)**

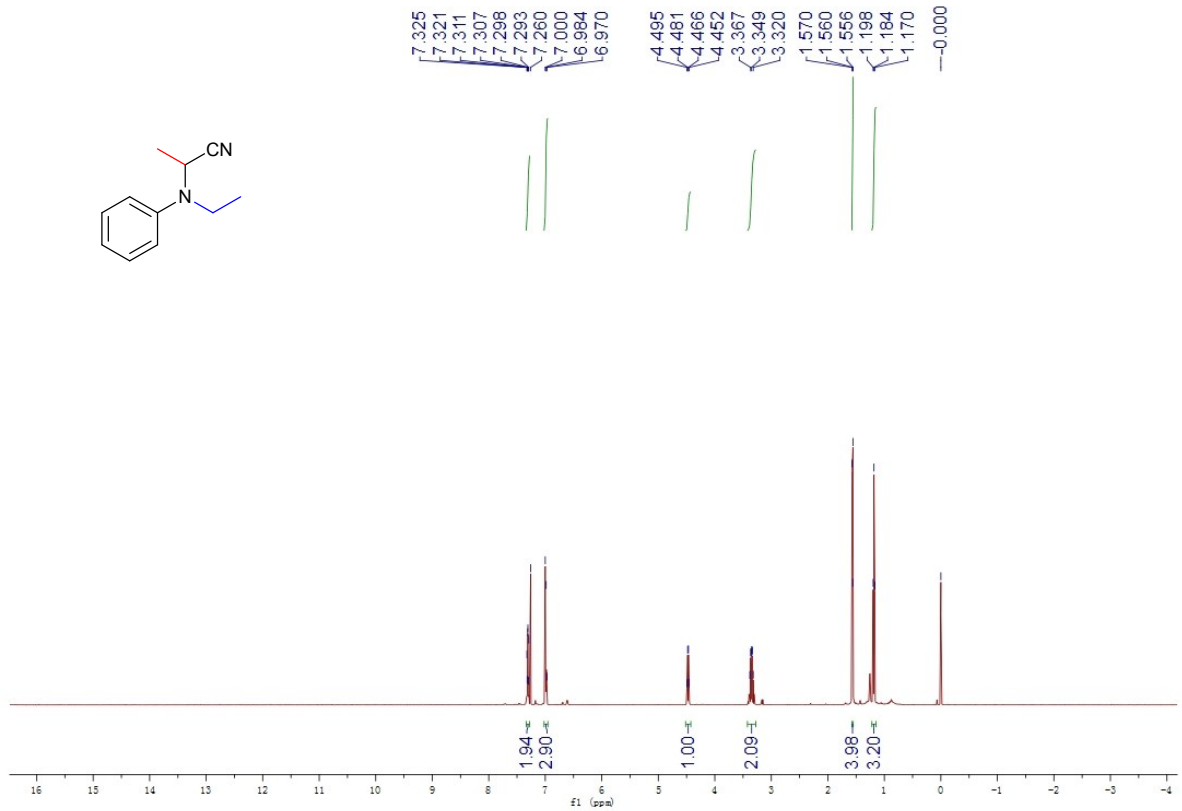

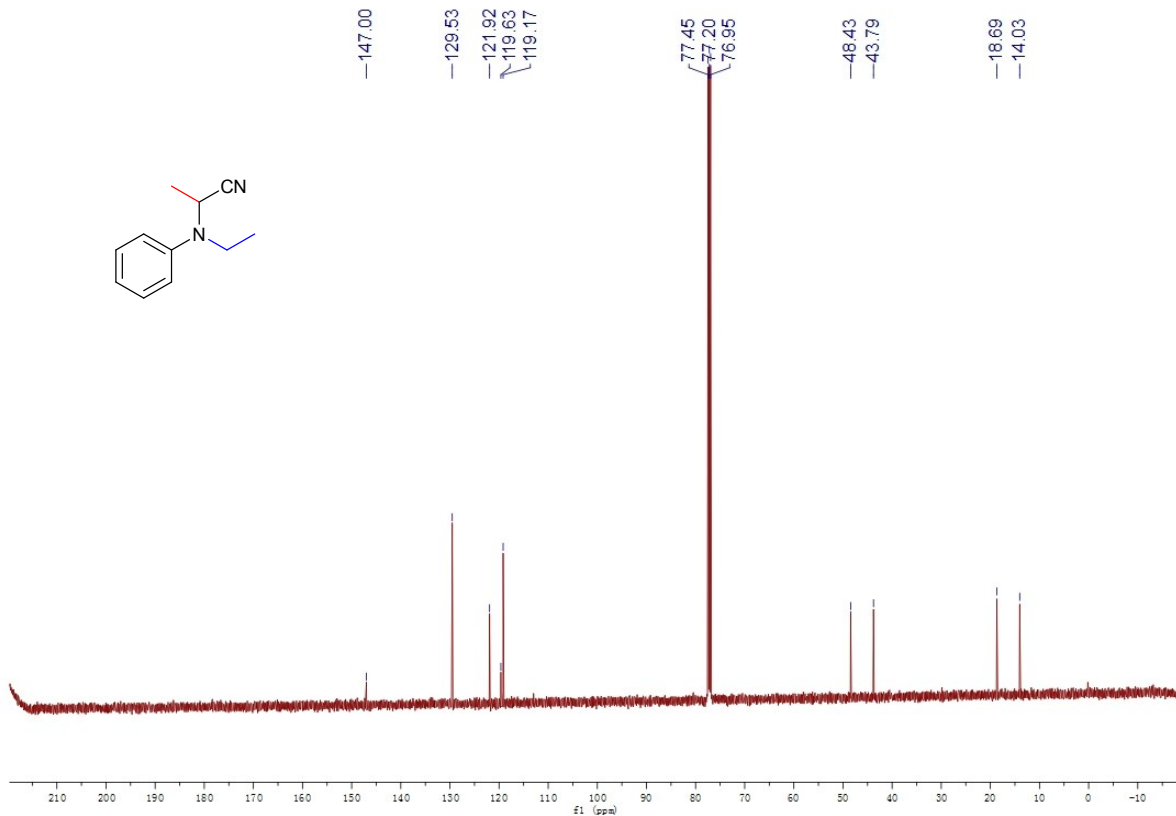

**2-(3,4-dihydroquinolin-1(2H)-yl)acetonitrile (2g)**

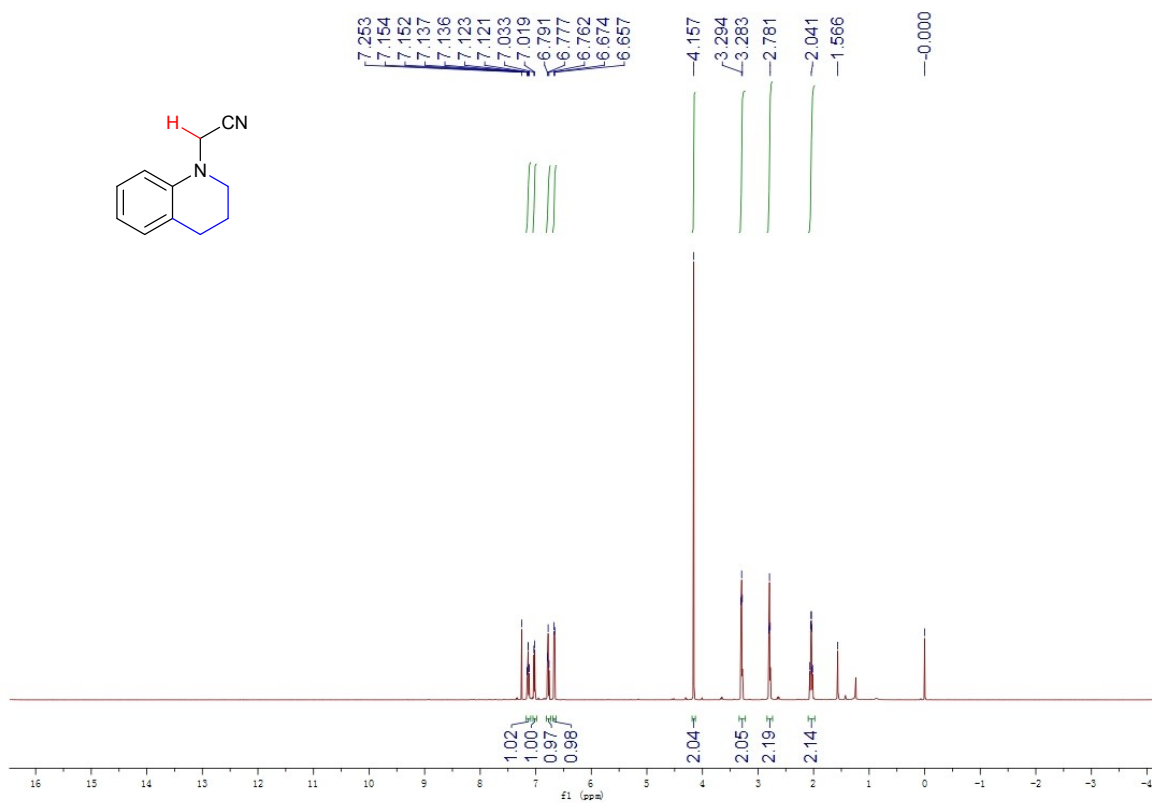

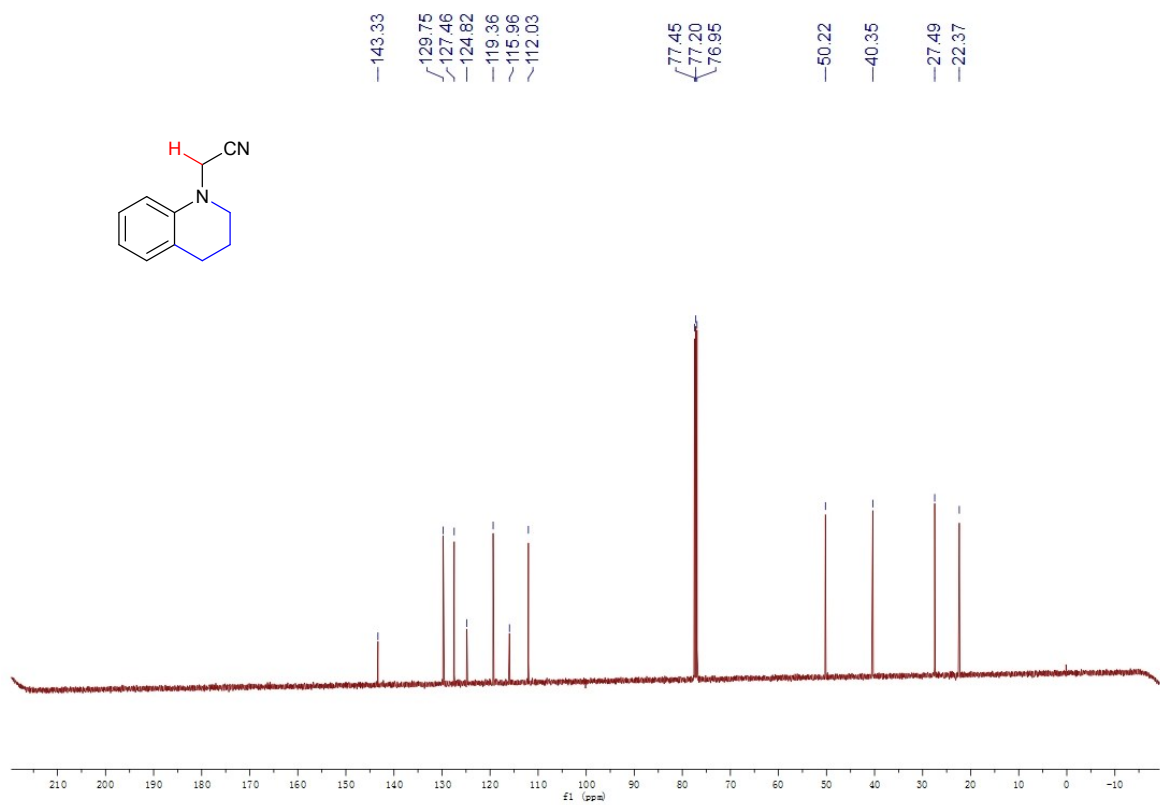

**2-(7-(trifluoromethyl)-3,4-dihydroquinolin-1(2H)-yl)acetonitrile (2h)**

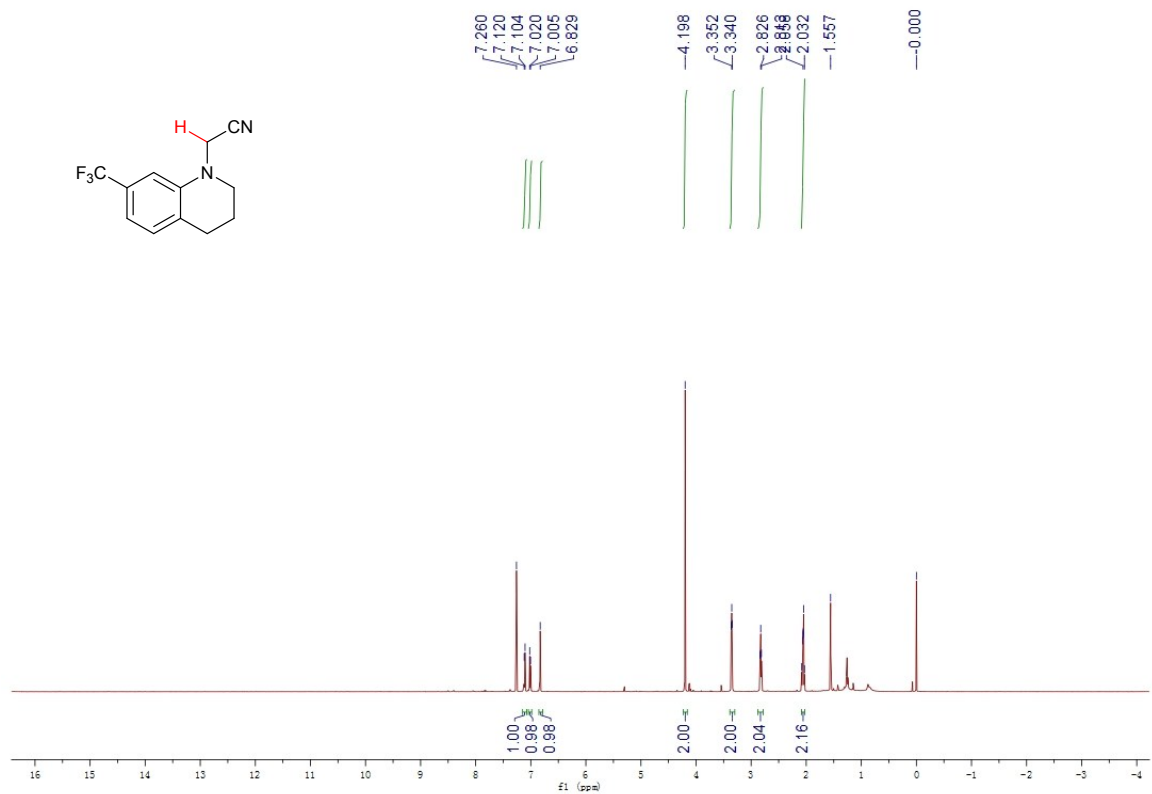



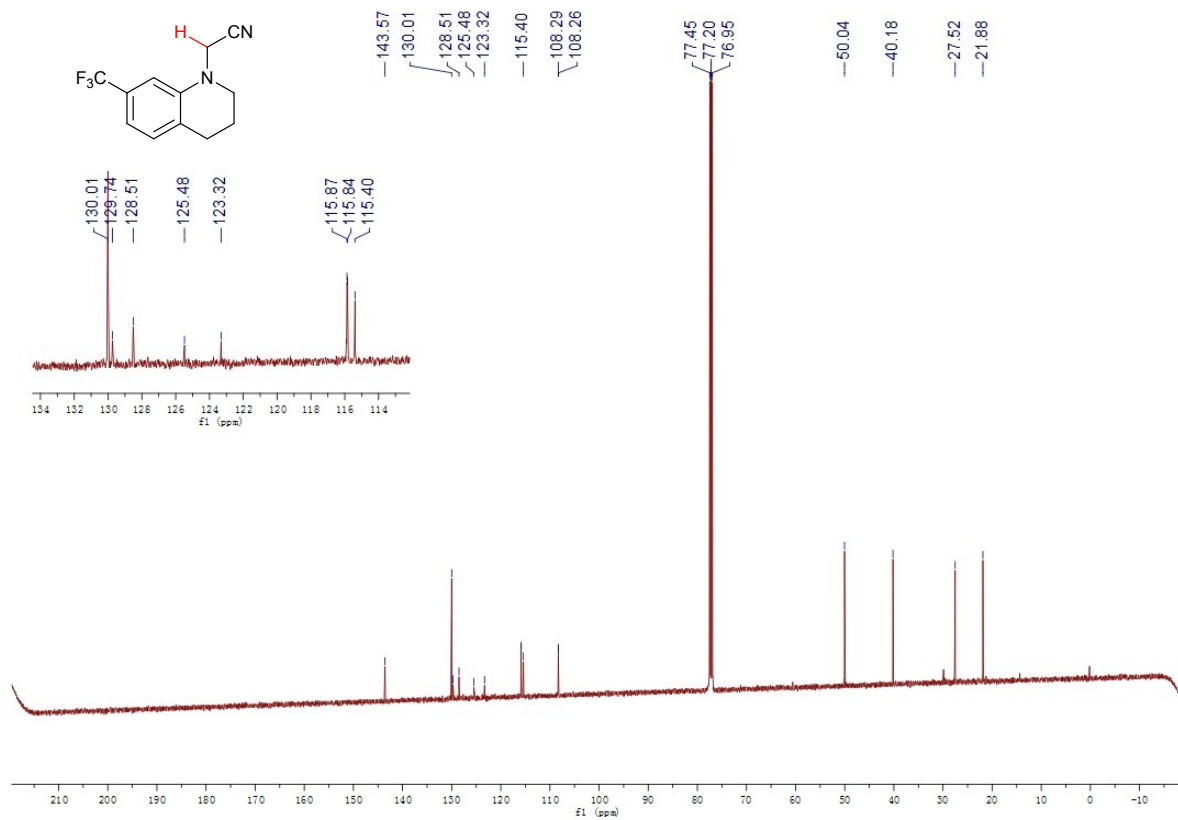

***N*-methyl-*N*-phenylaminoacetonitrile (2i)**

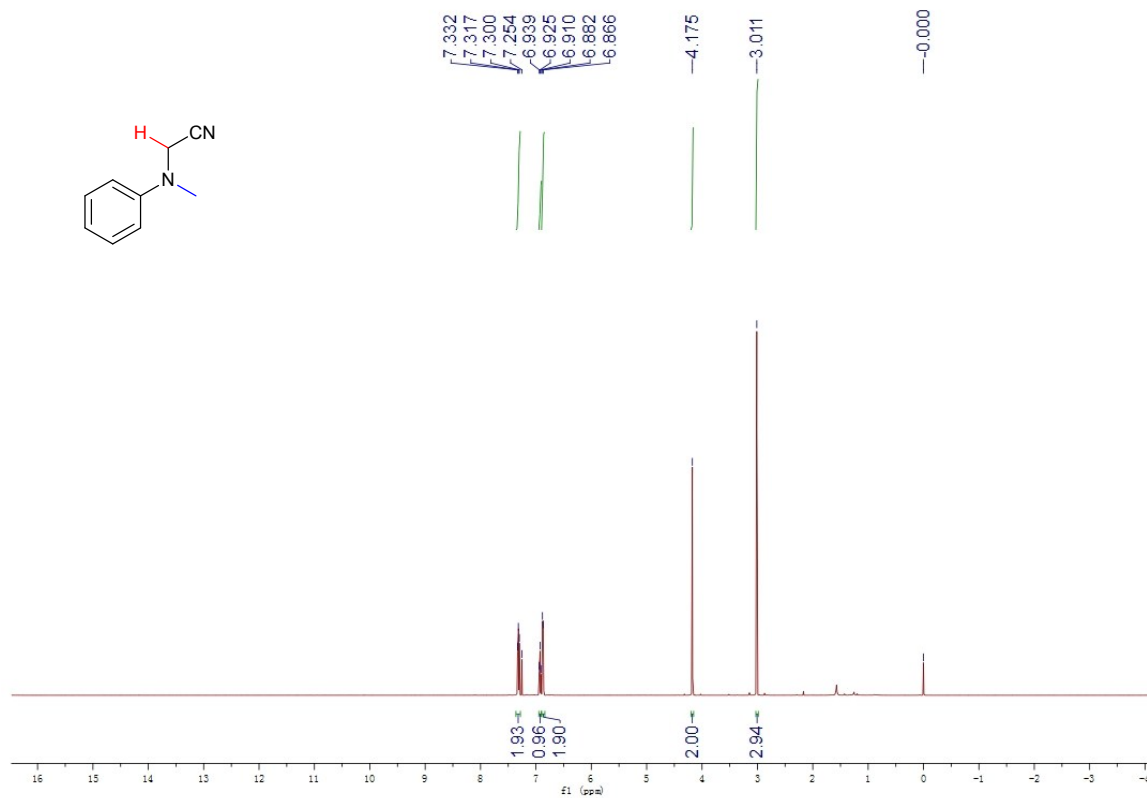

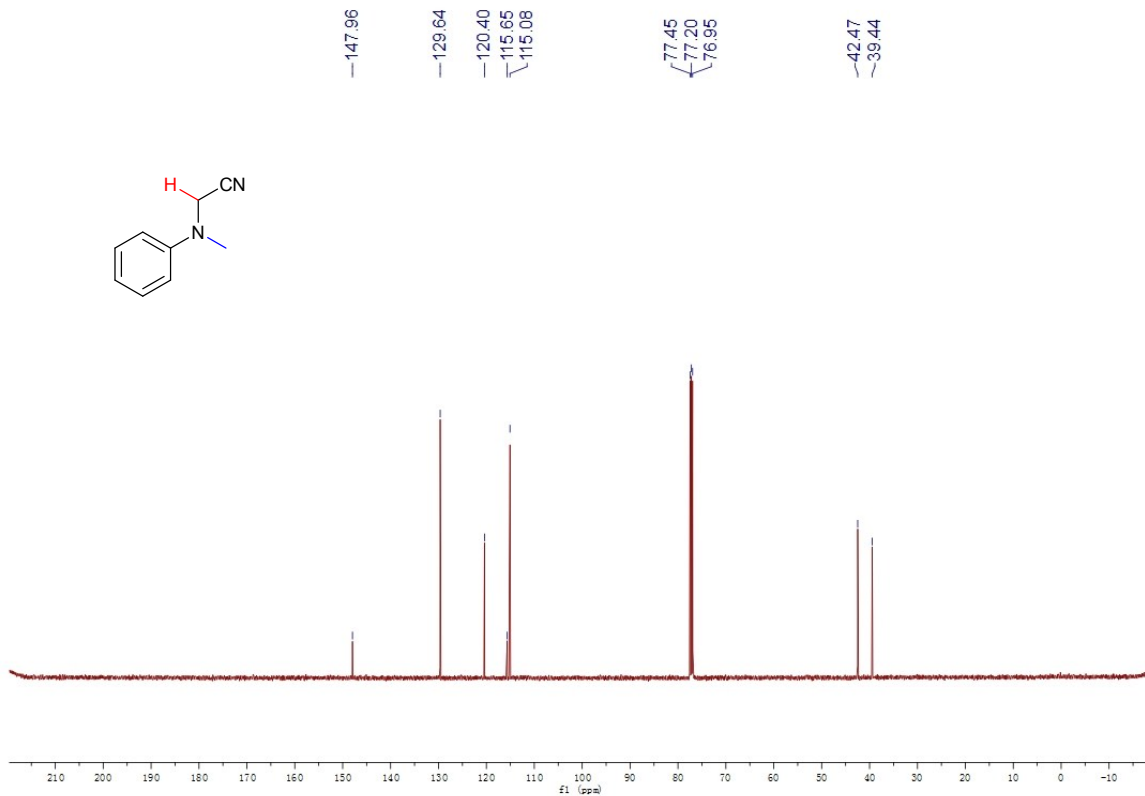

***N*-ethyl-*N*-phenylaminoacetonitrile (2j)**

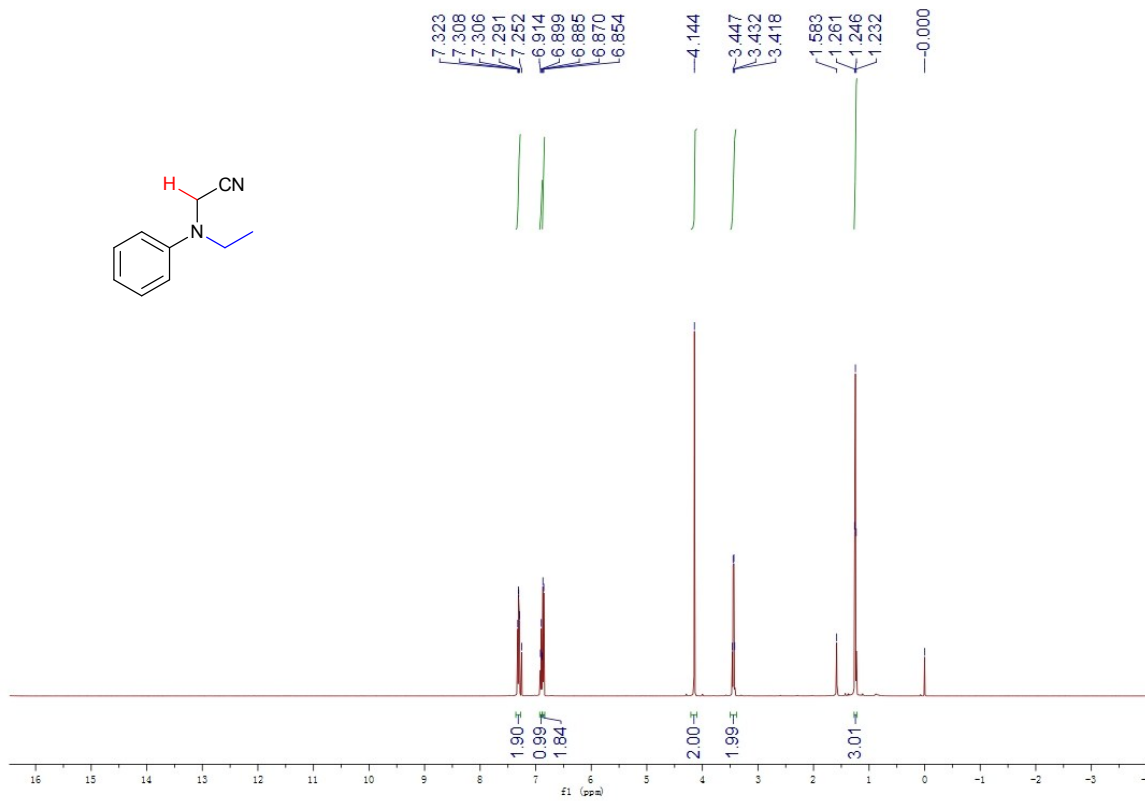

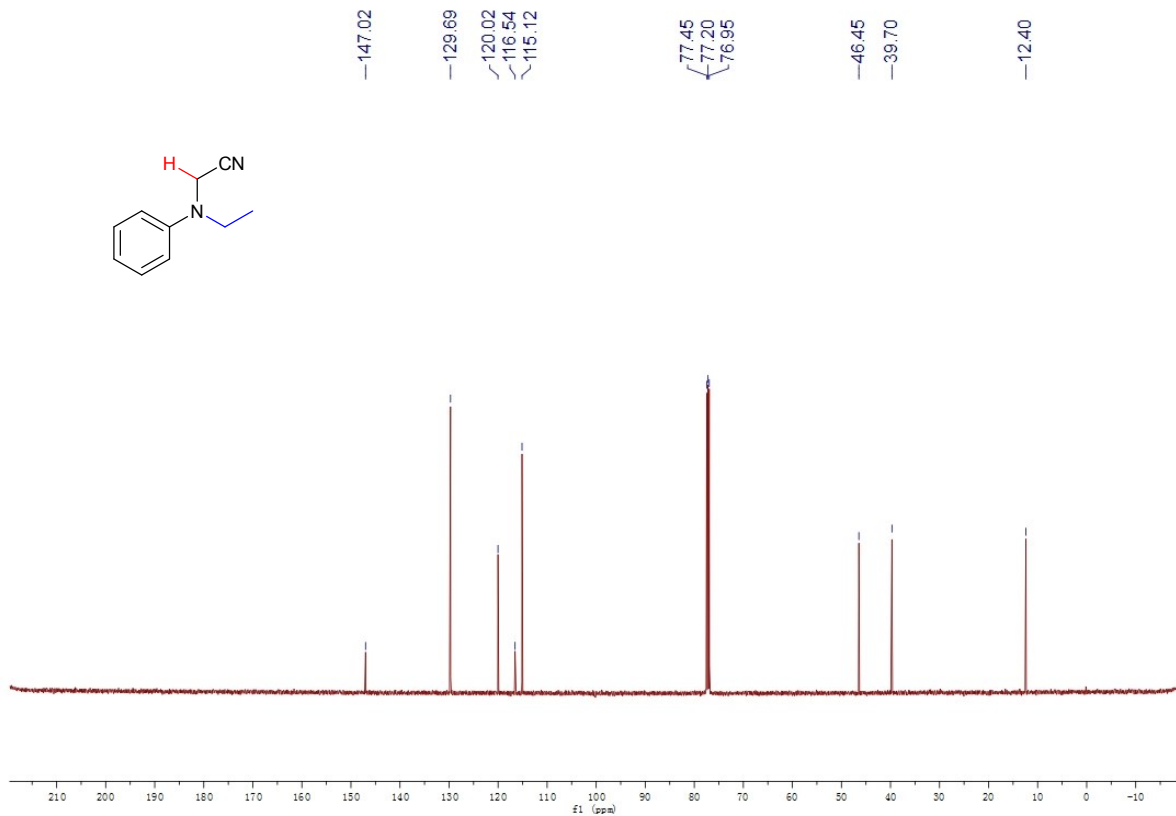

**2-(indolin-1-yl)acetonitrile (2k)**

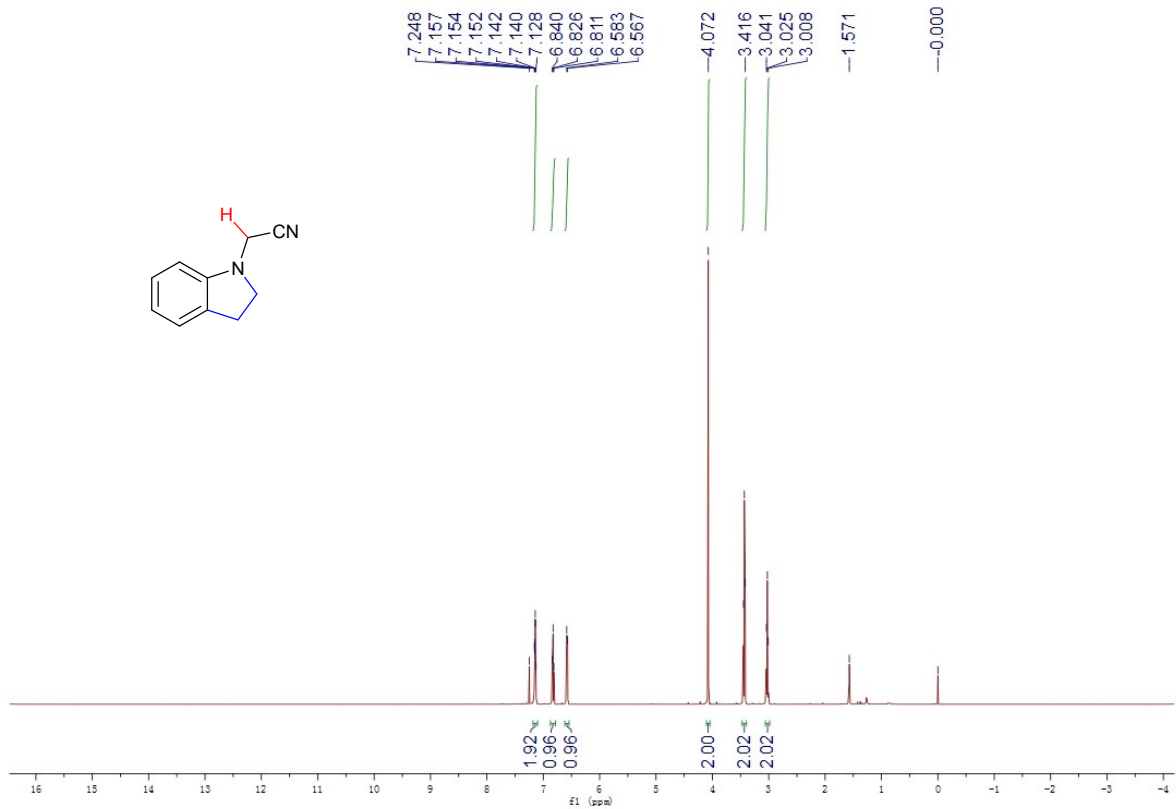

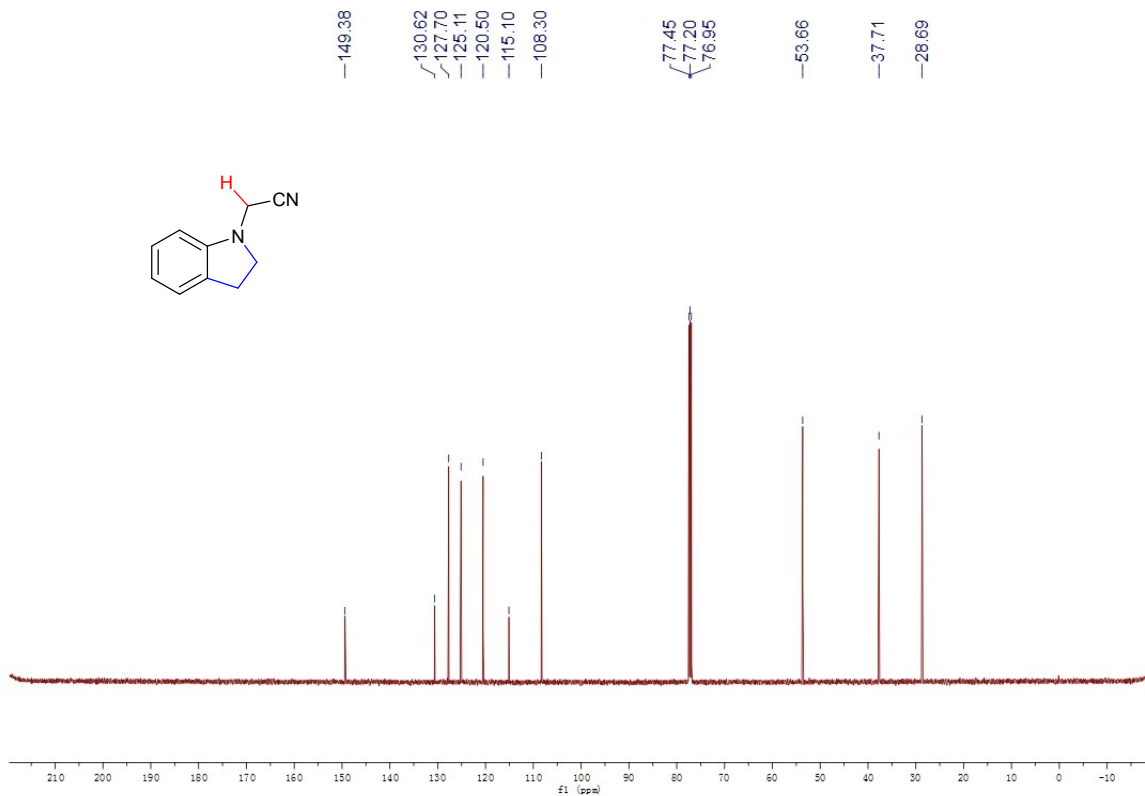

**2-(2-methylindolin-1-yl)acetonitrile (2l)**

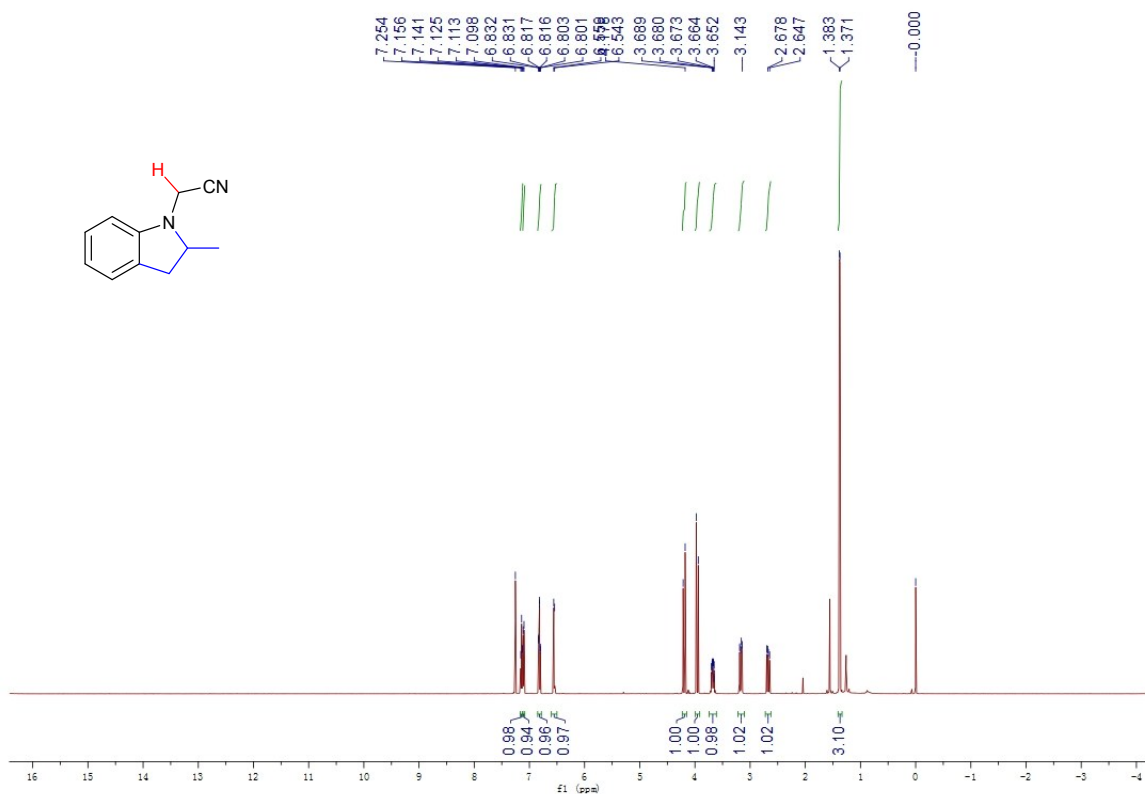

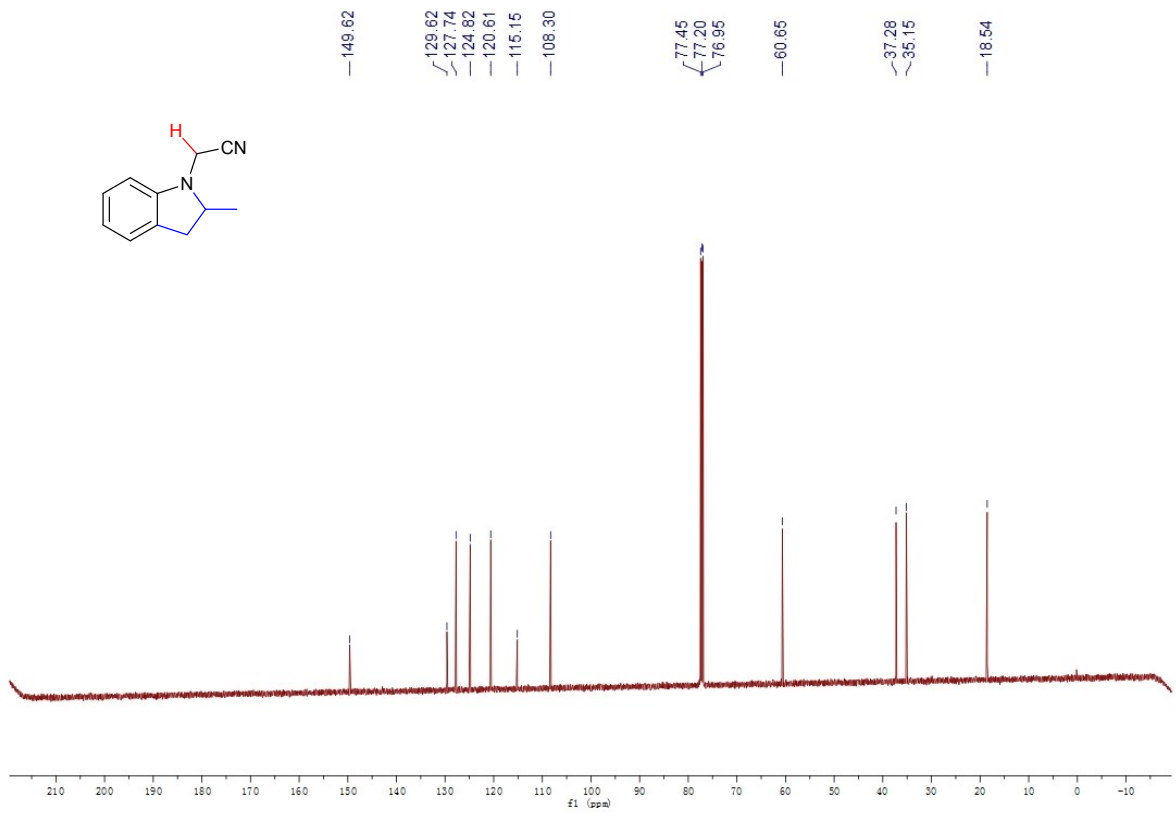

**N-benzyl-N-phenylaminoacetonitrile (2m)**

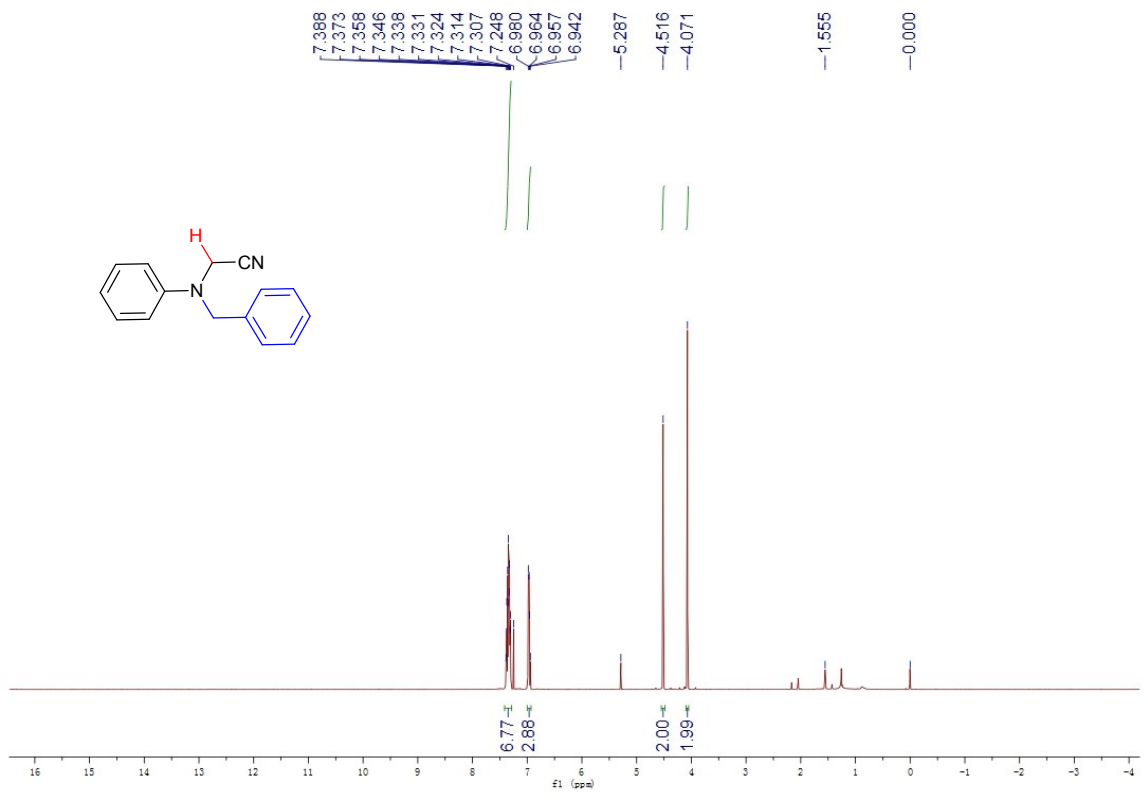

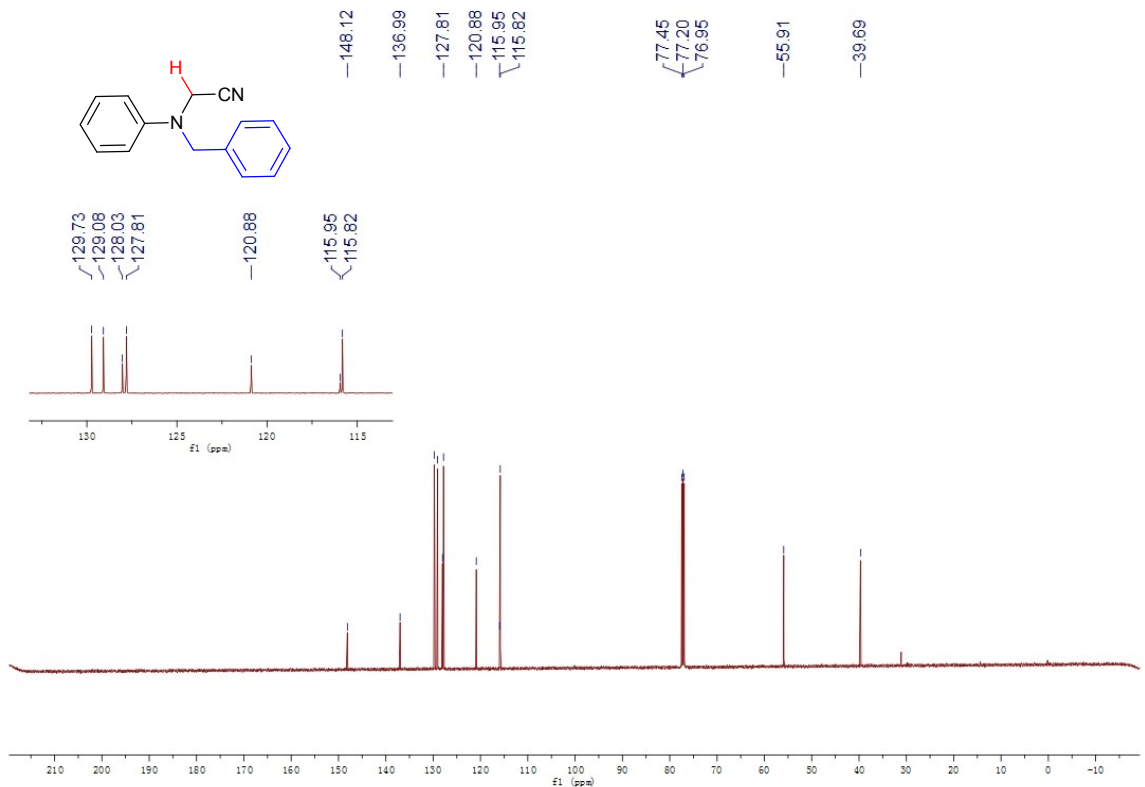

**N-heptyl-N-phenylaminoacetonitrile (2n)**

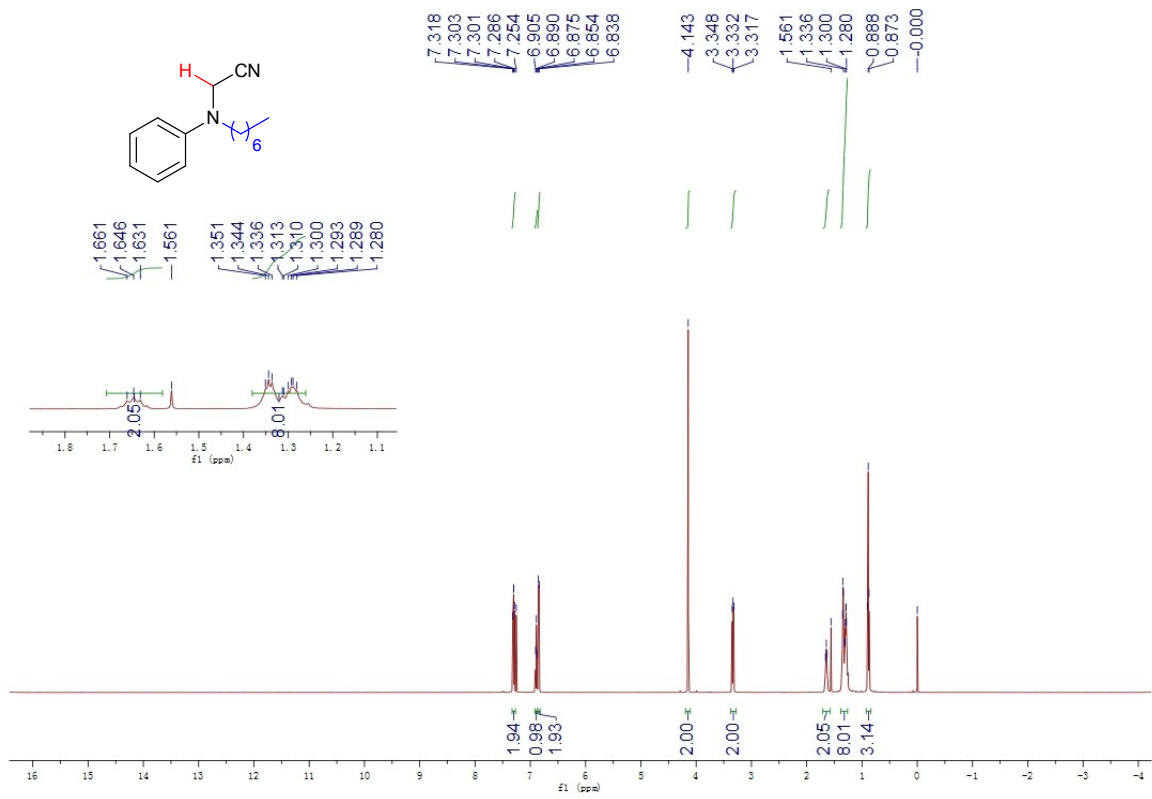

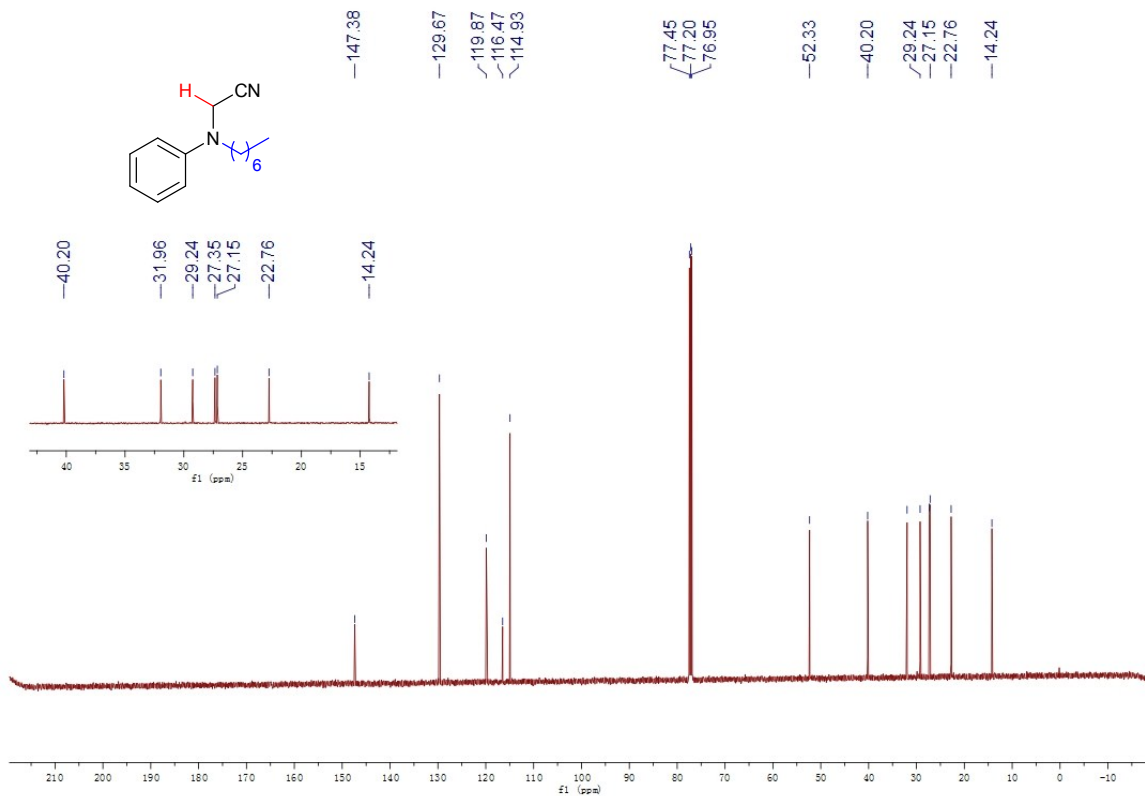

***N*-(3-bromophenyl)-*N*-methylaminoacetonitrile (2o)**

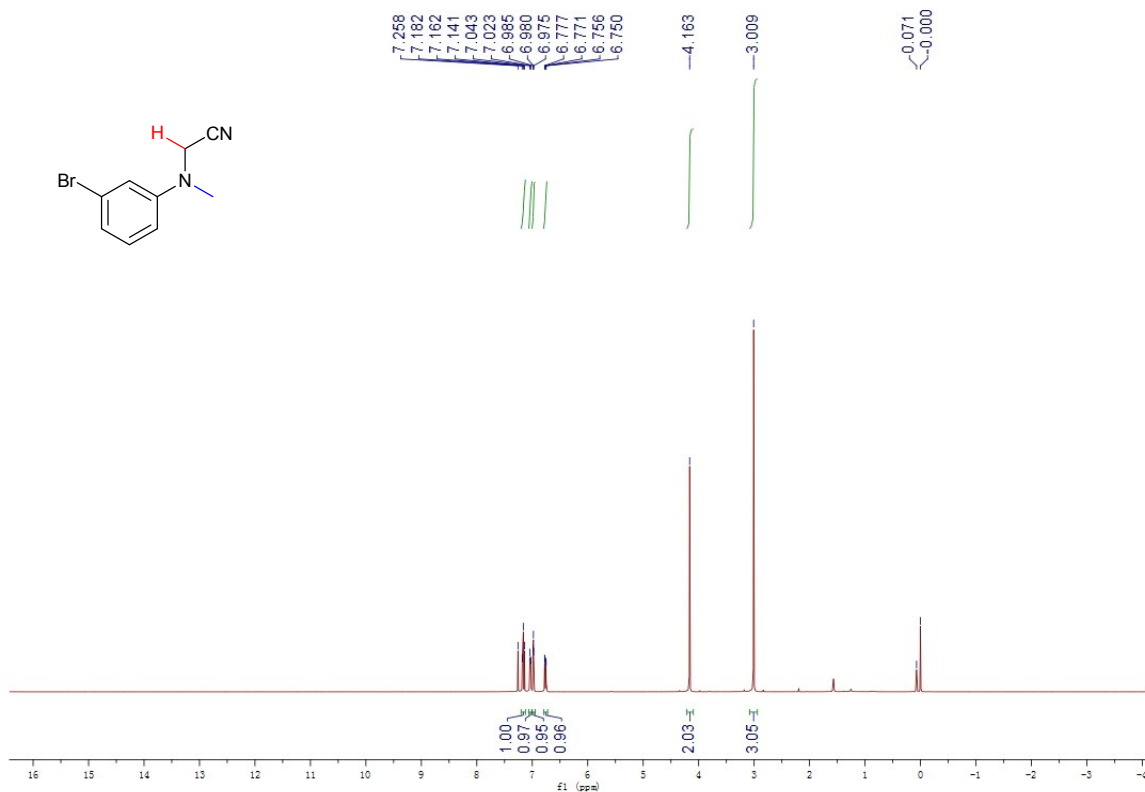

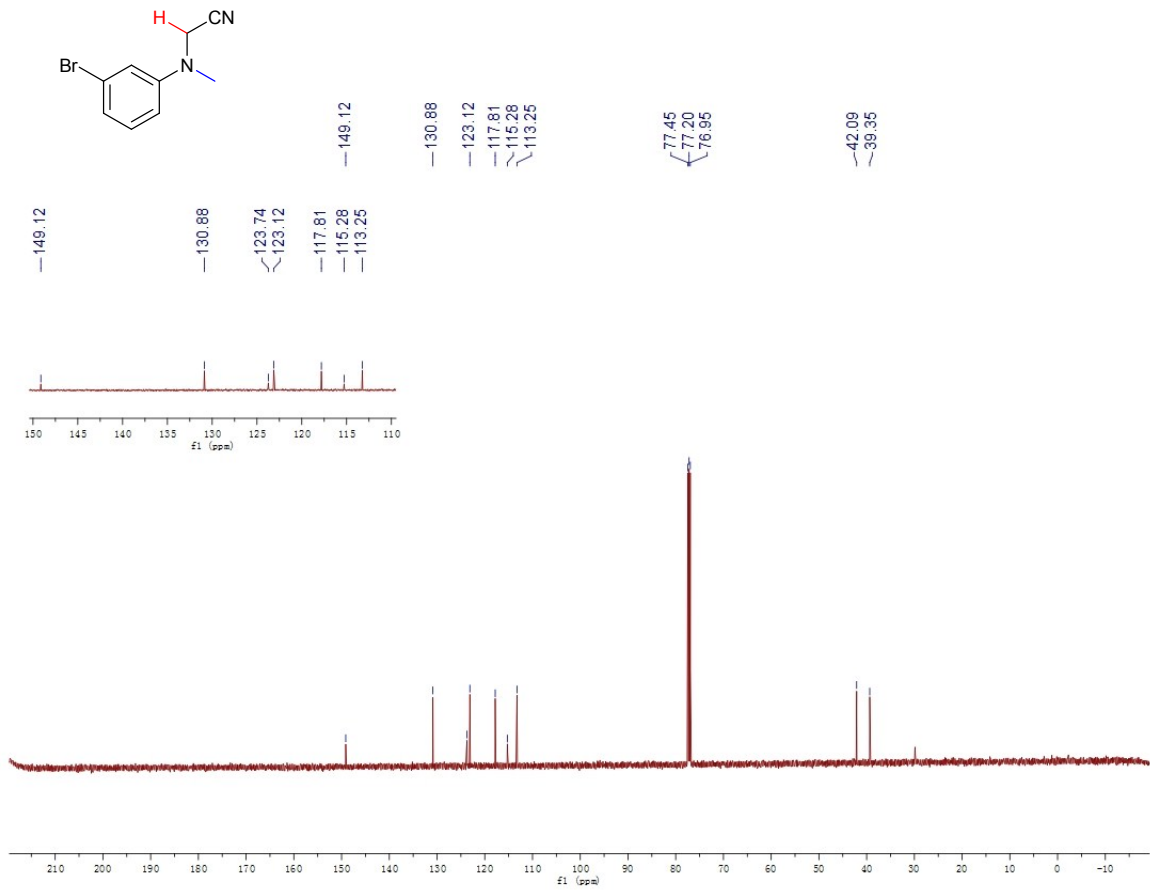

***N*-(2-bromophenyl)-*N*-methylaminoacetonitrile (2p)**

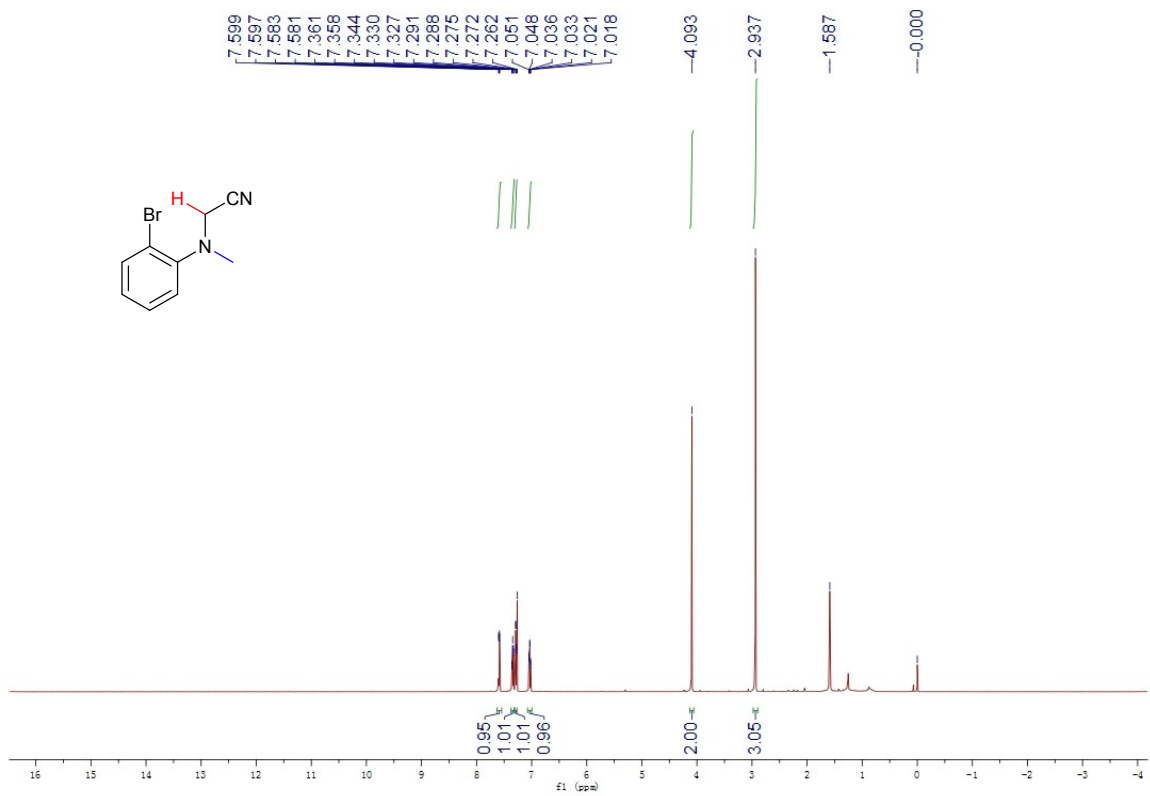





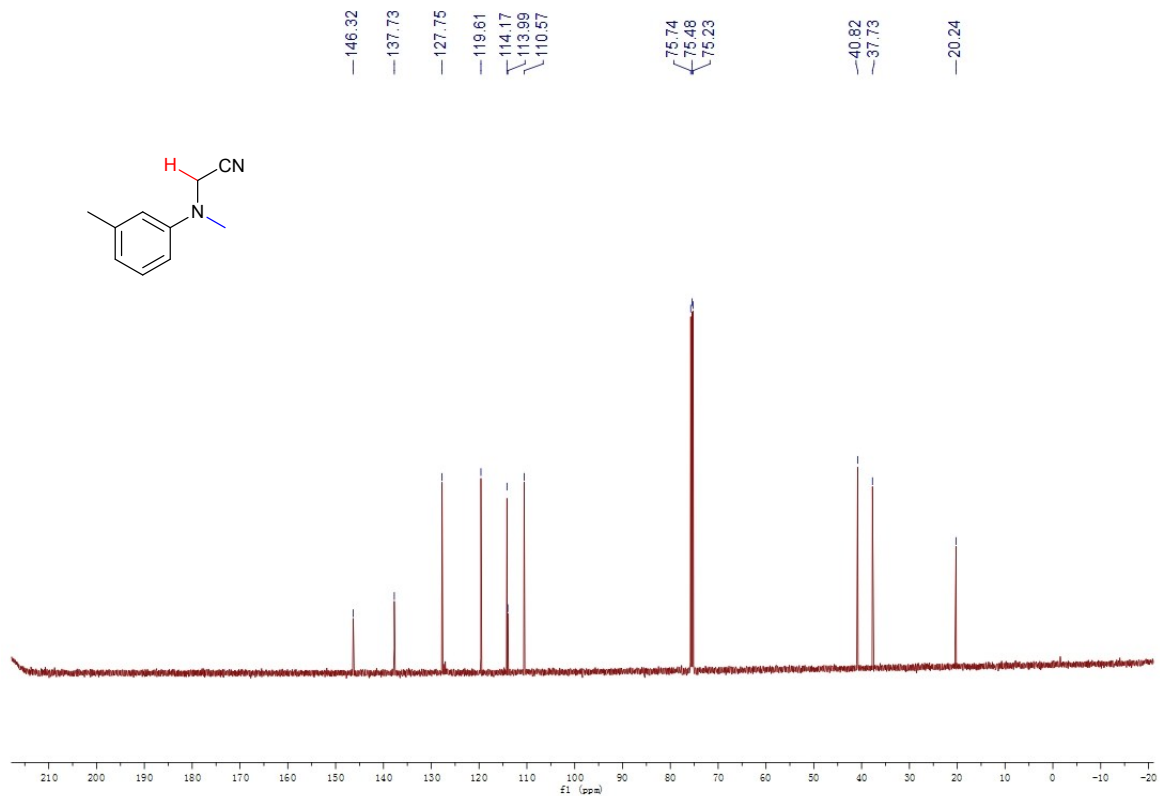

***N*-Methyl-*N*-(2-methylphenyl)aminoacetonitrile (2r)**

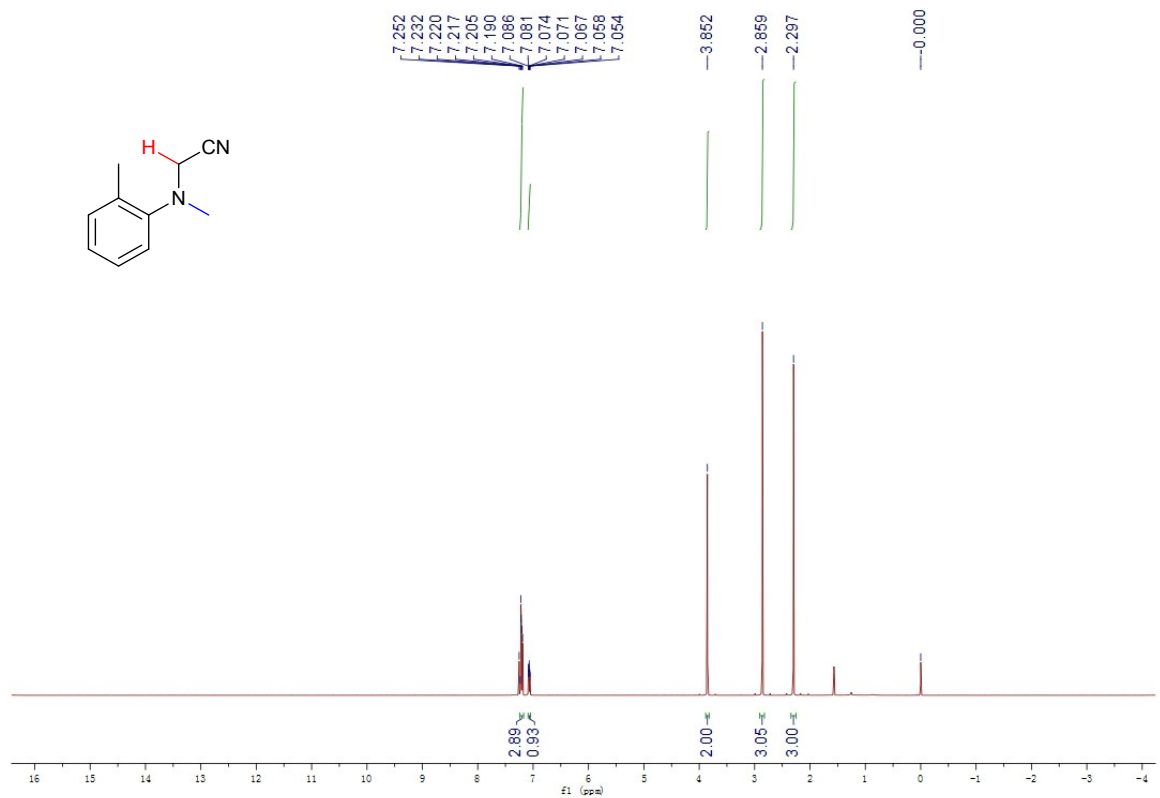

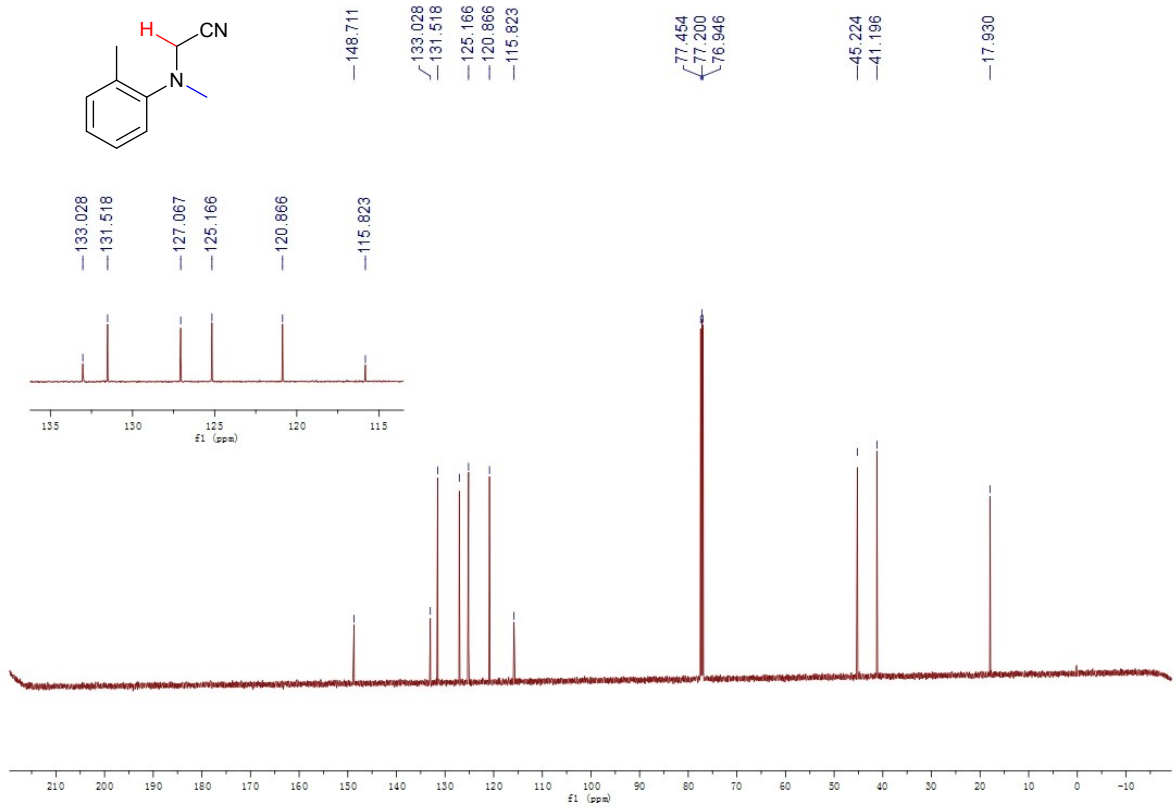

***N*-Methyl-*N*-(4-methylphenyl)aminoacetonitrile (2s)**

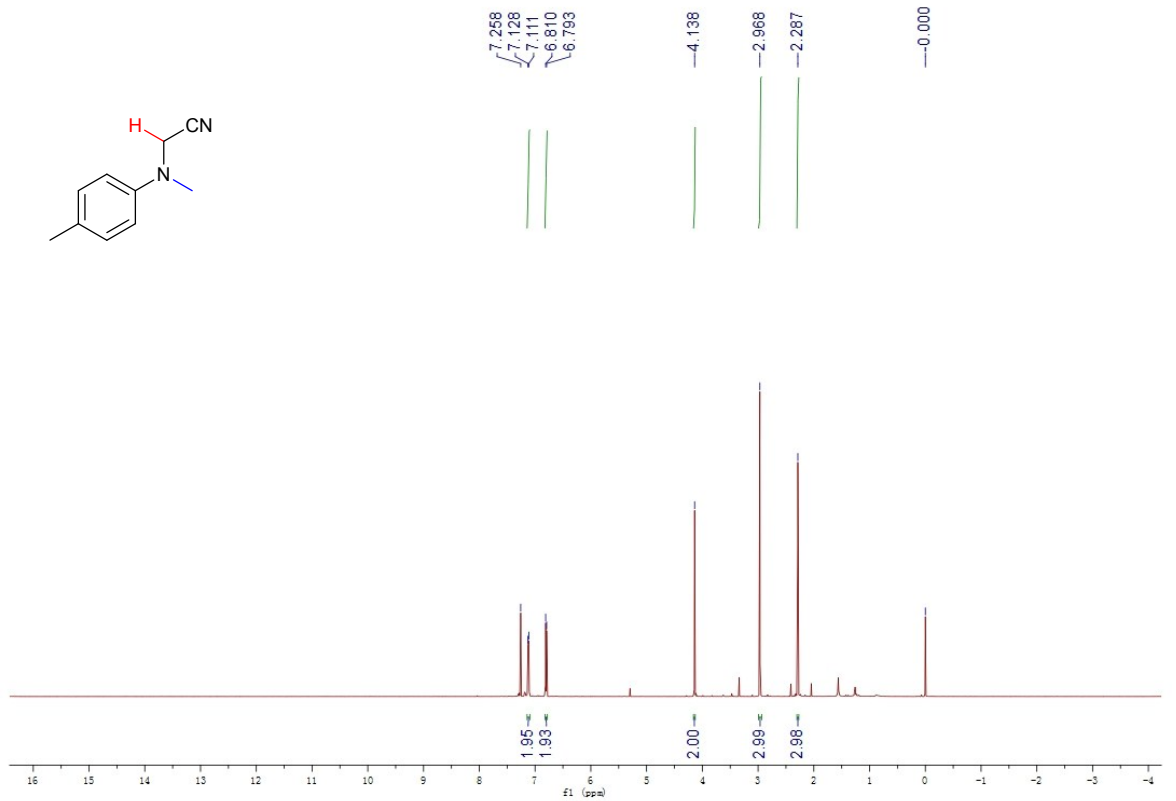

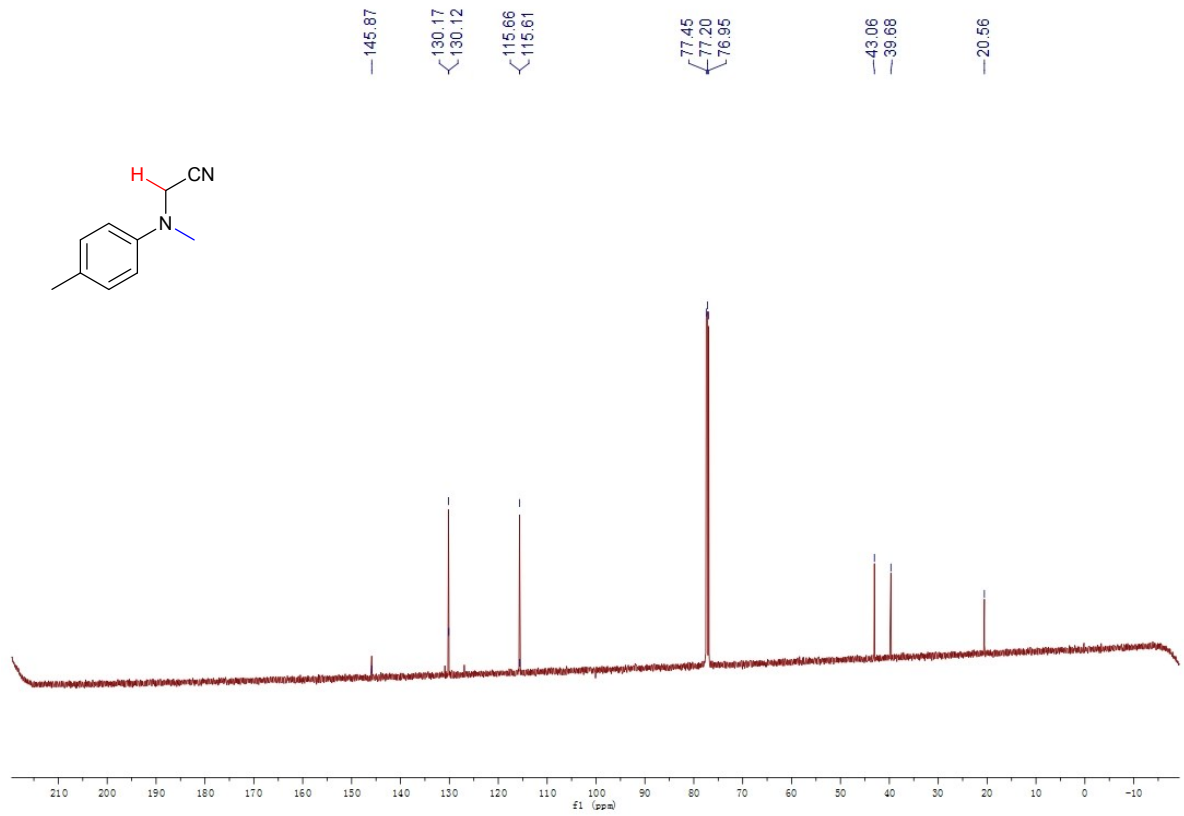

**2-(indolin-1-yl)butanenitrile (2t)**

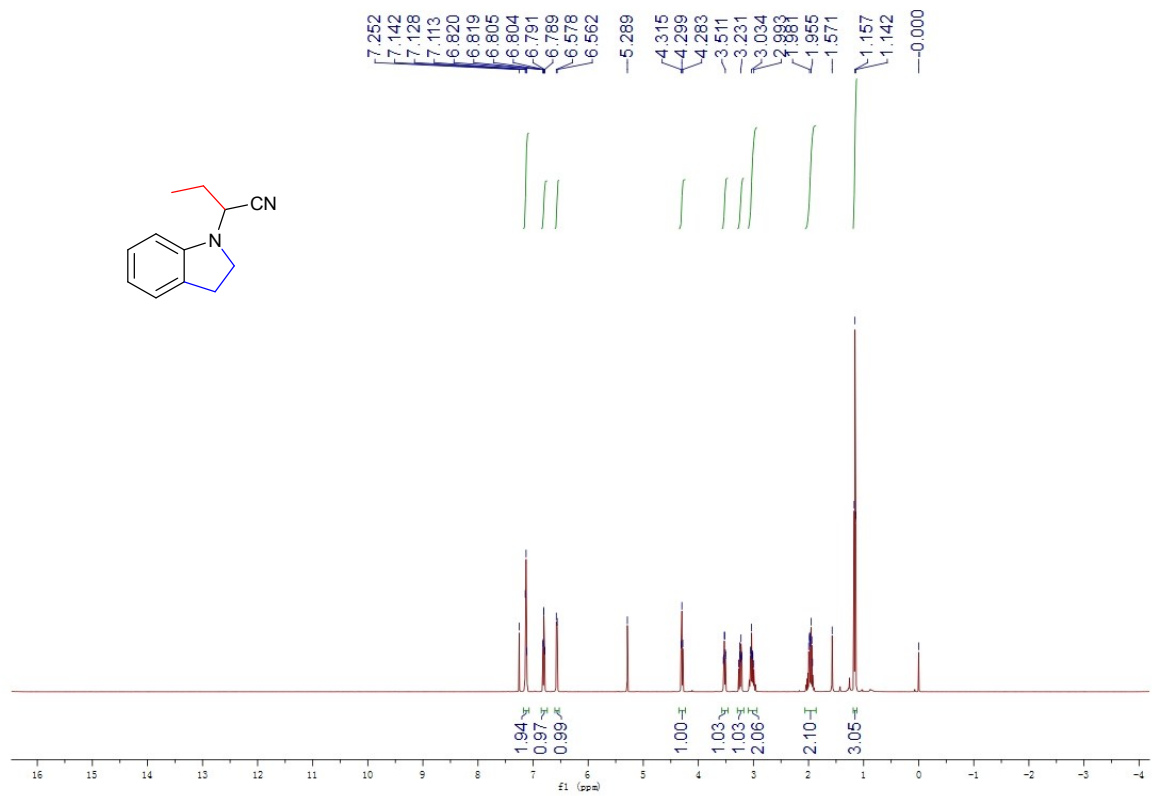

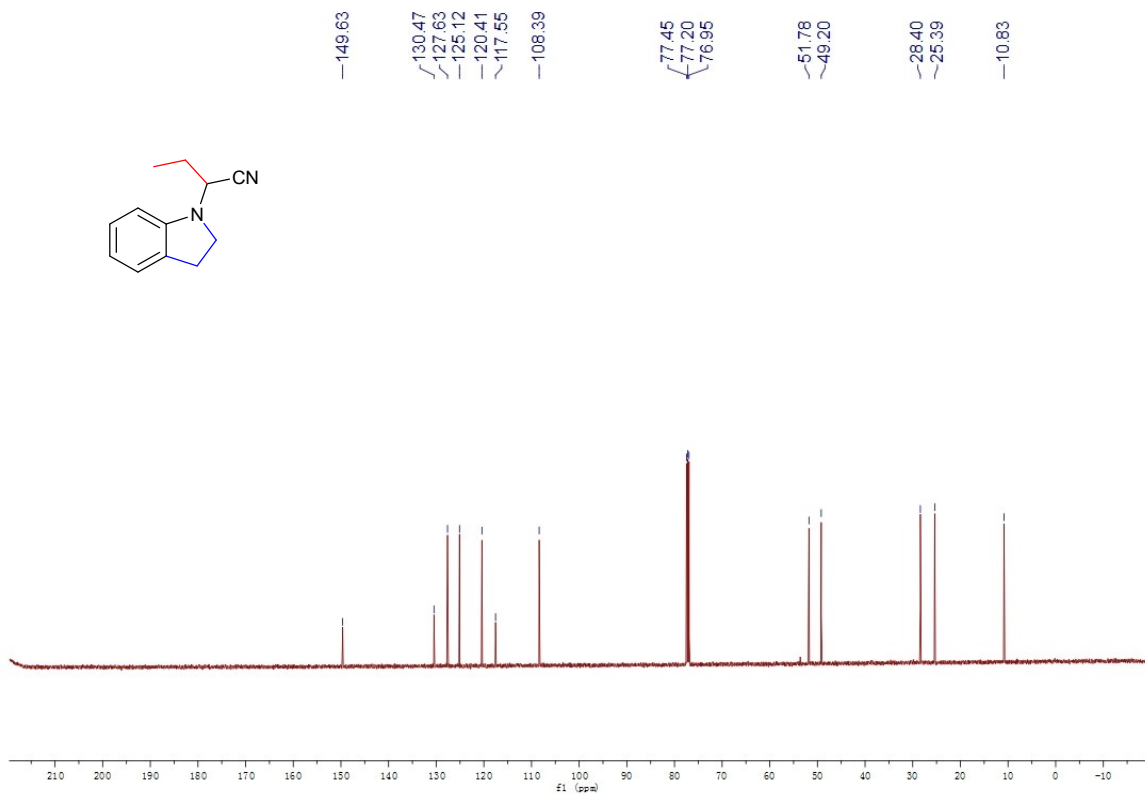

### 2-(2-methylindolin-1-yl)butanenitrile (2u) (Major isomer)

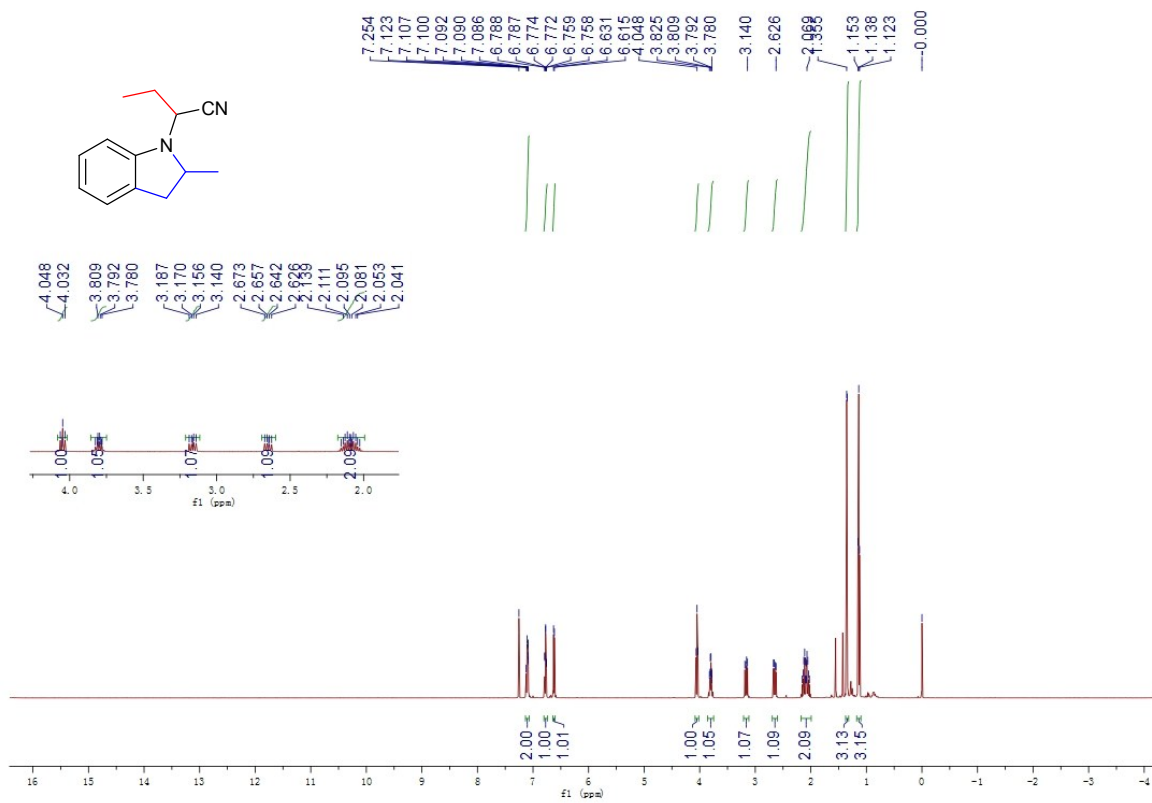

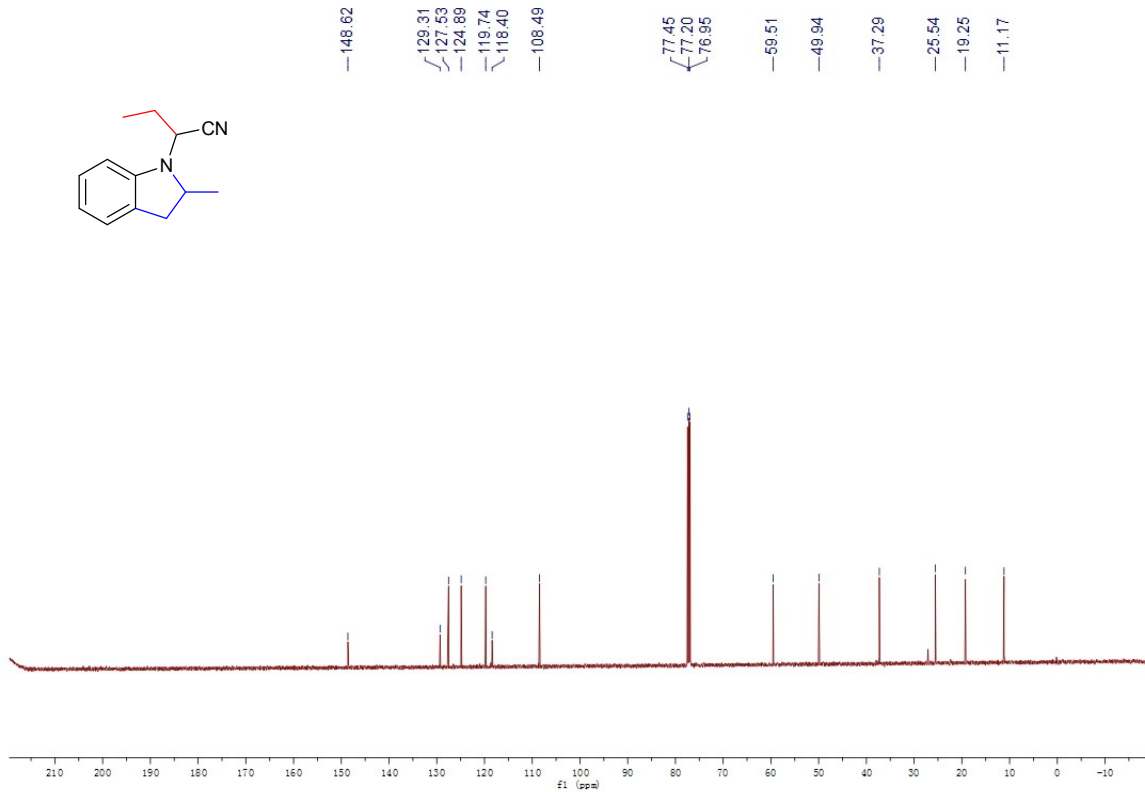

**2-(2-methylindolin-1-yl)butanenitrile (2u) (Minor isomer)**

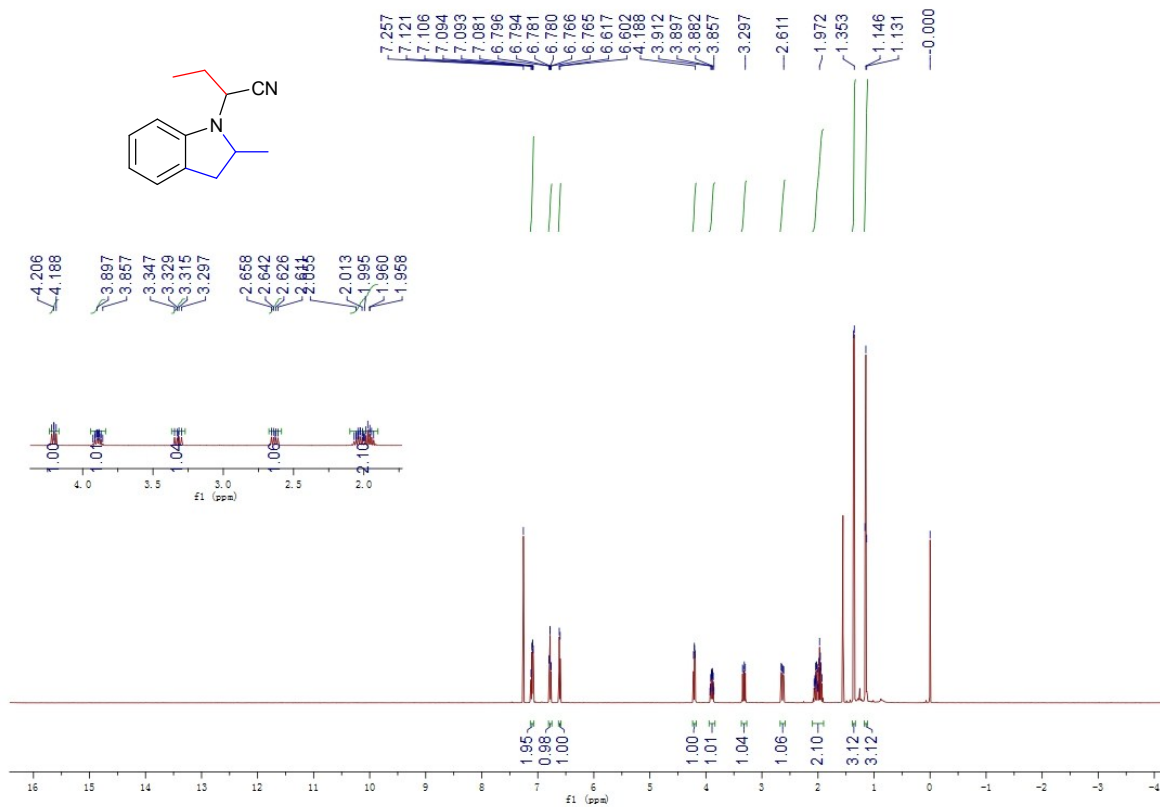

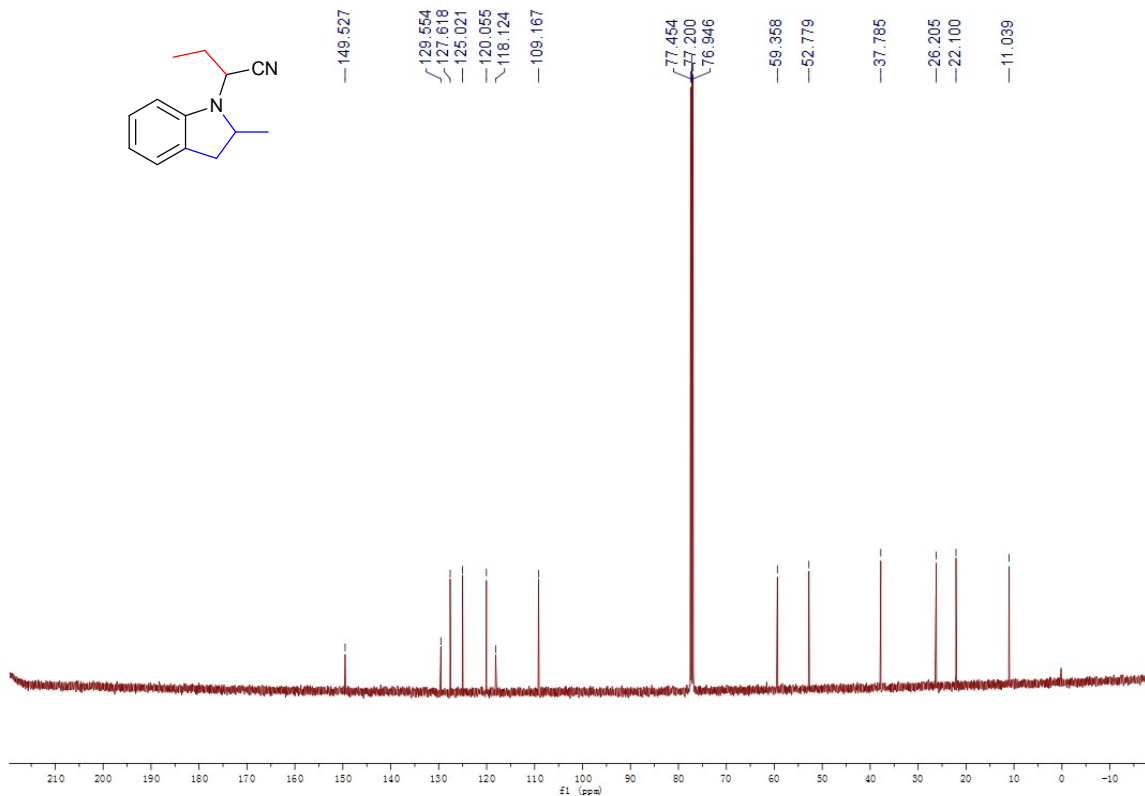

**2-(indolin-1-yl)pentanenitrile (2v)**

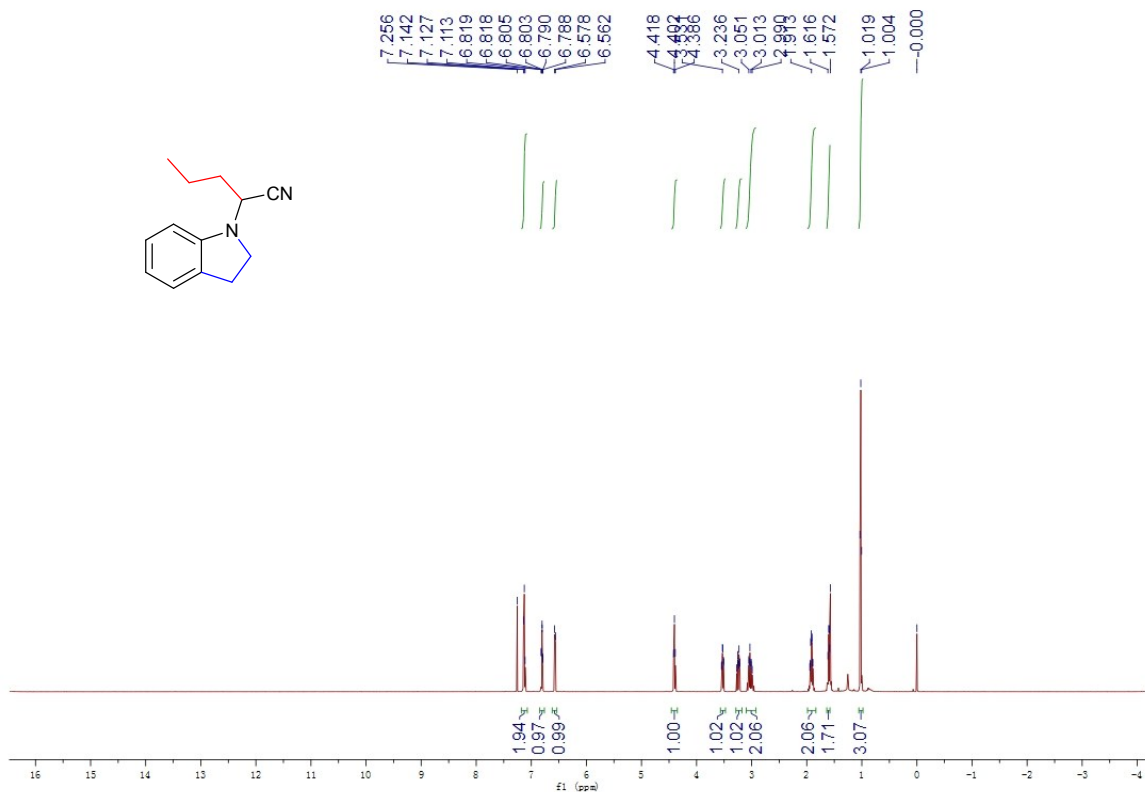

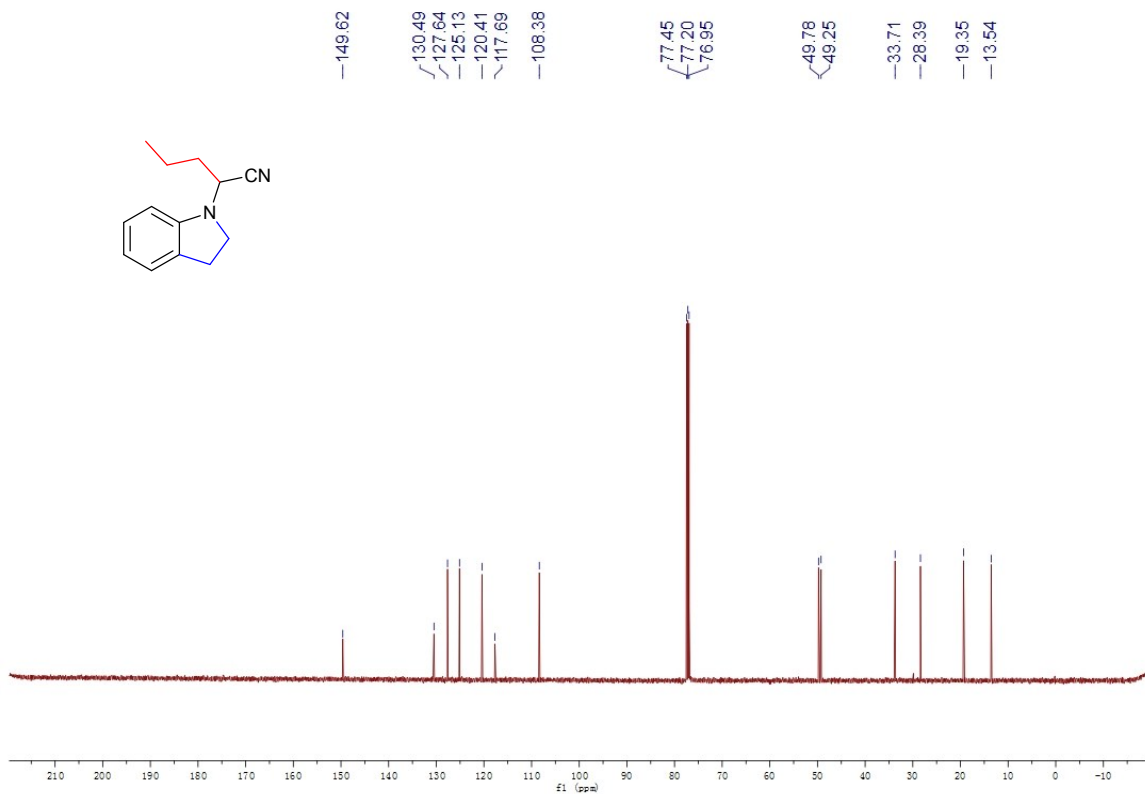

**2-(indolin-1-yl)-2-phenylacetonitrile (2w)**

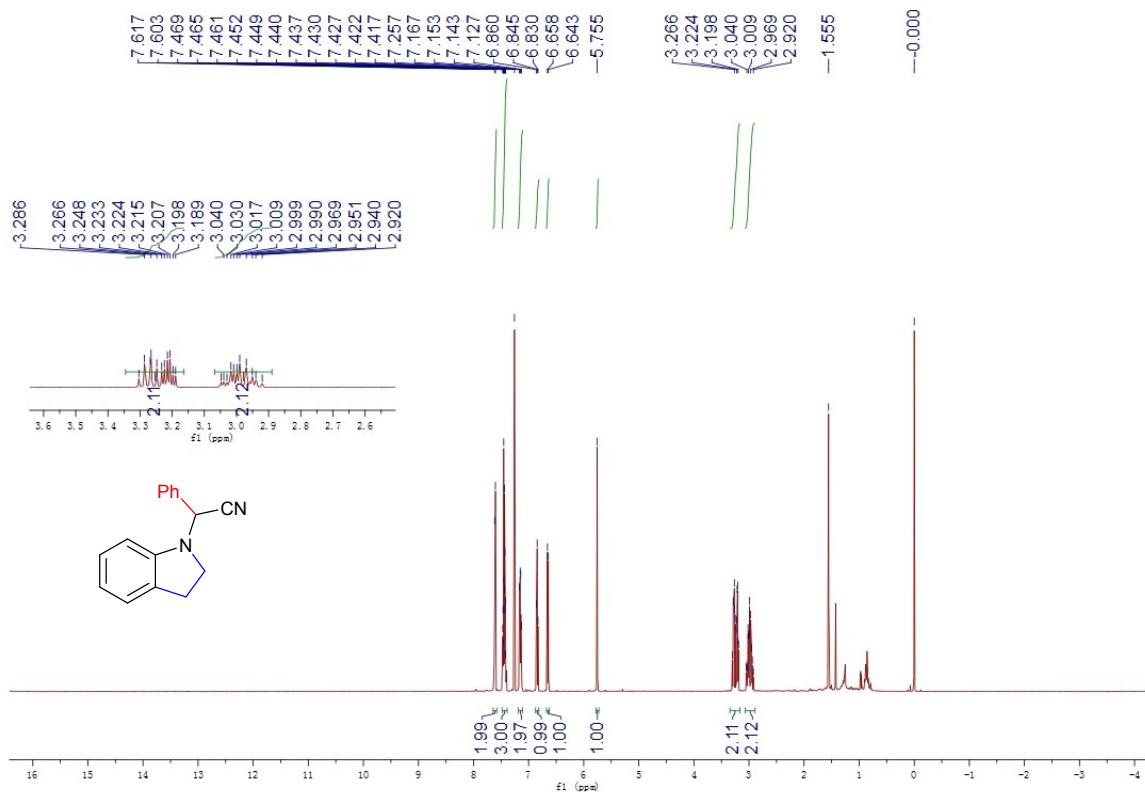



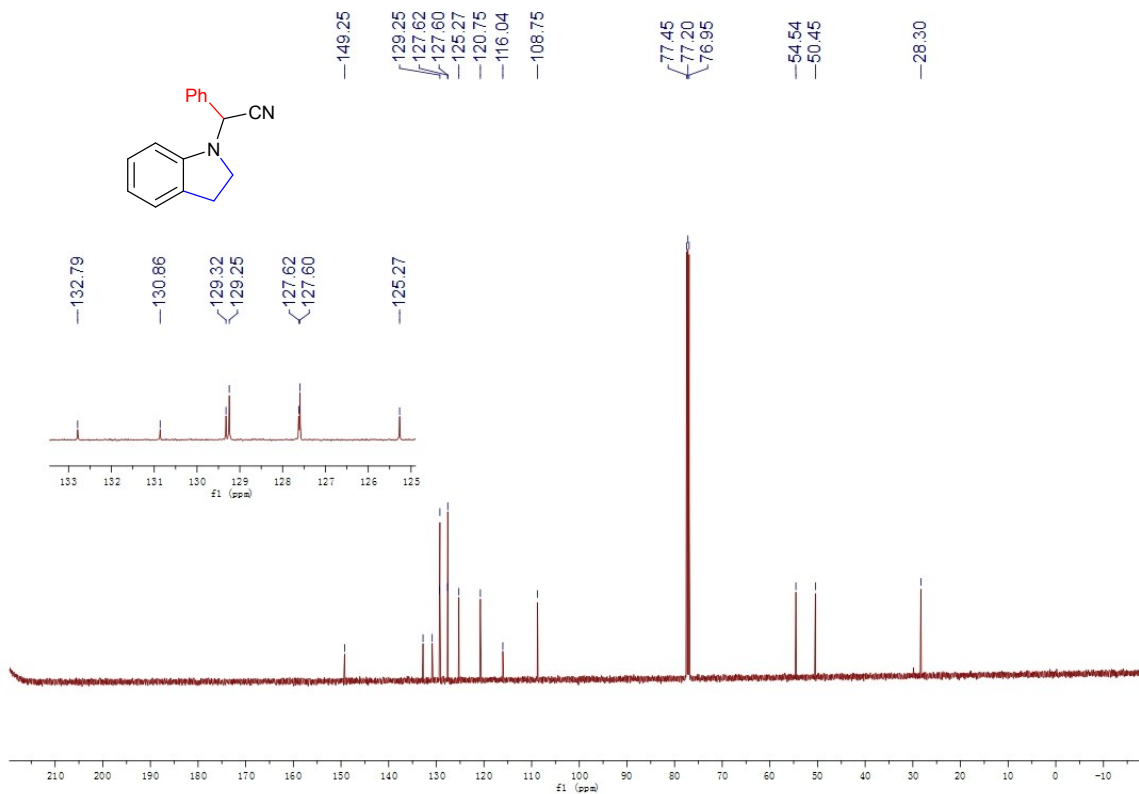

**3,4-dihydroquinoline-1(2H)-carboxamide (3)**

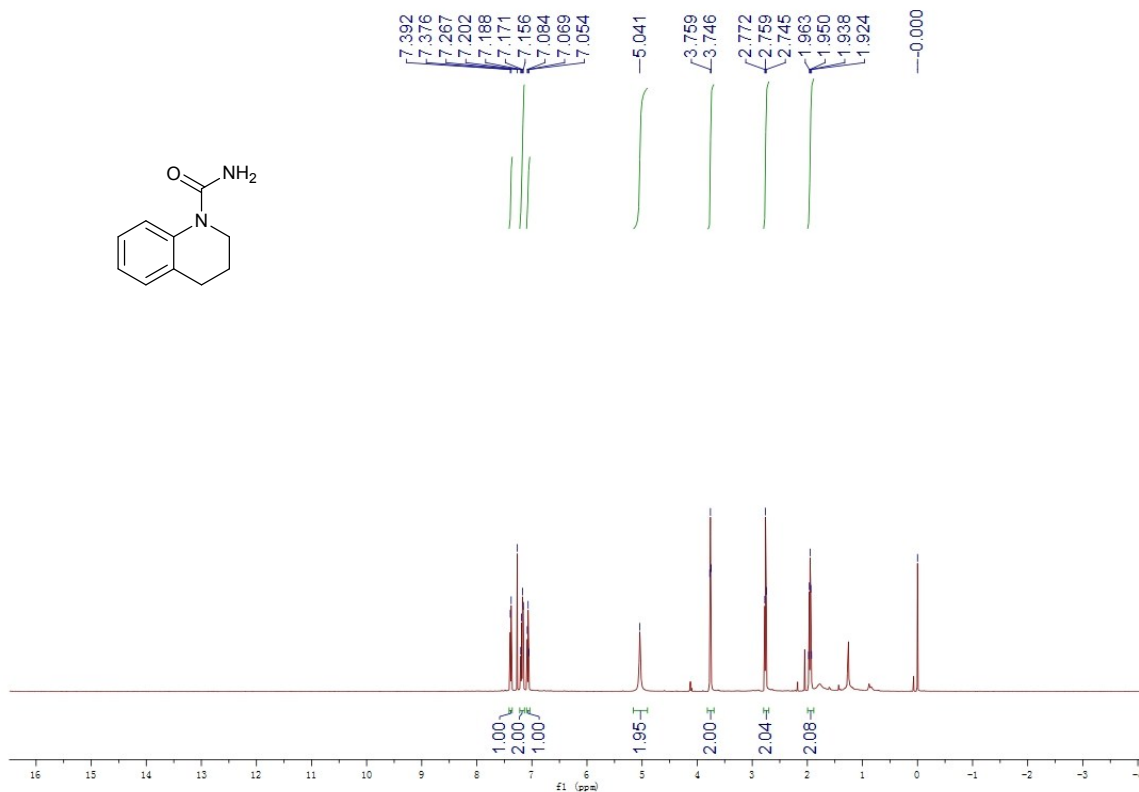

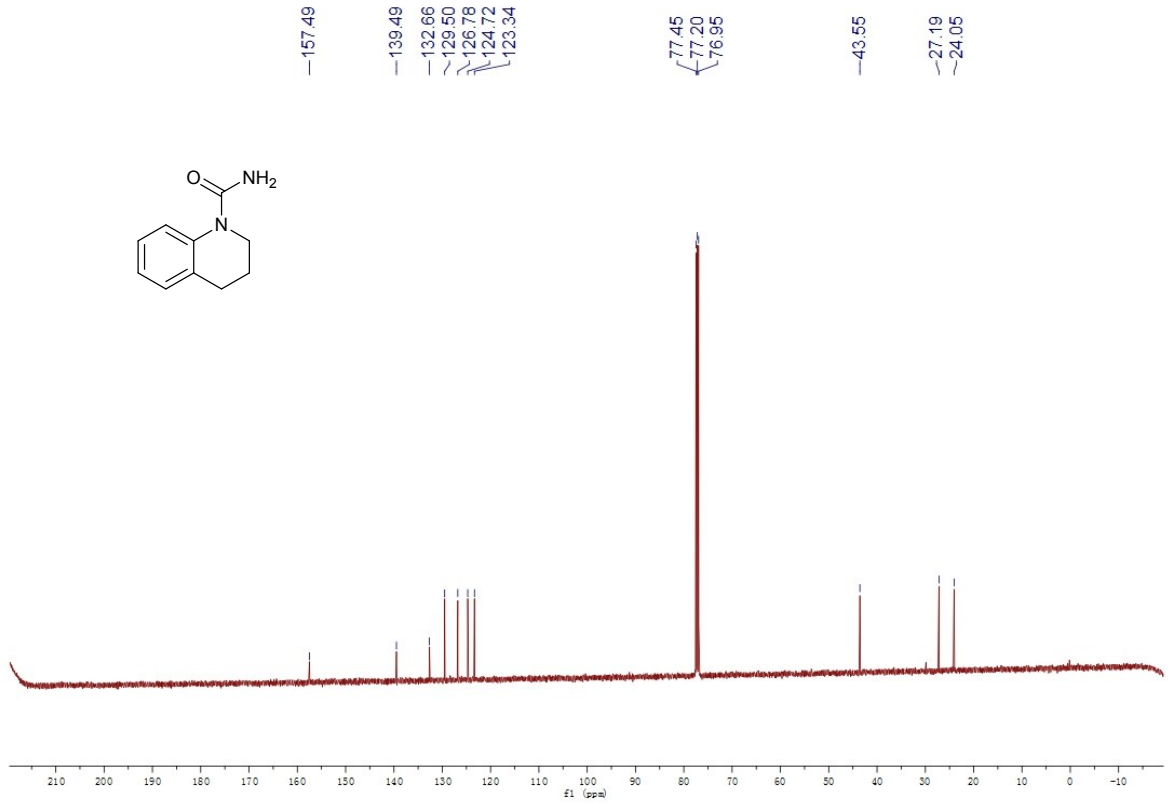

**1,2,3,4-tetrahydroquinoline-2-carbonitrile (4)**

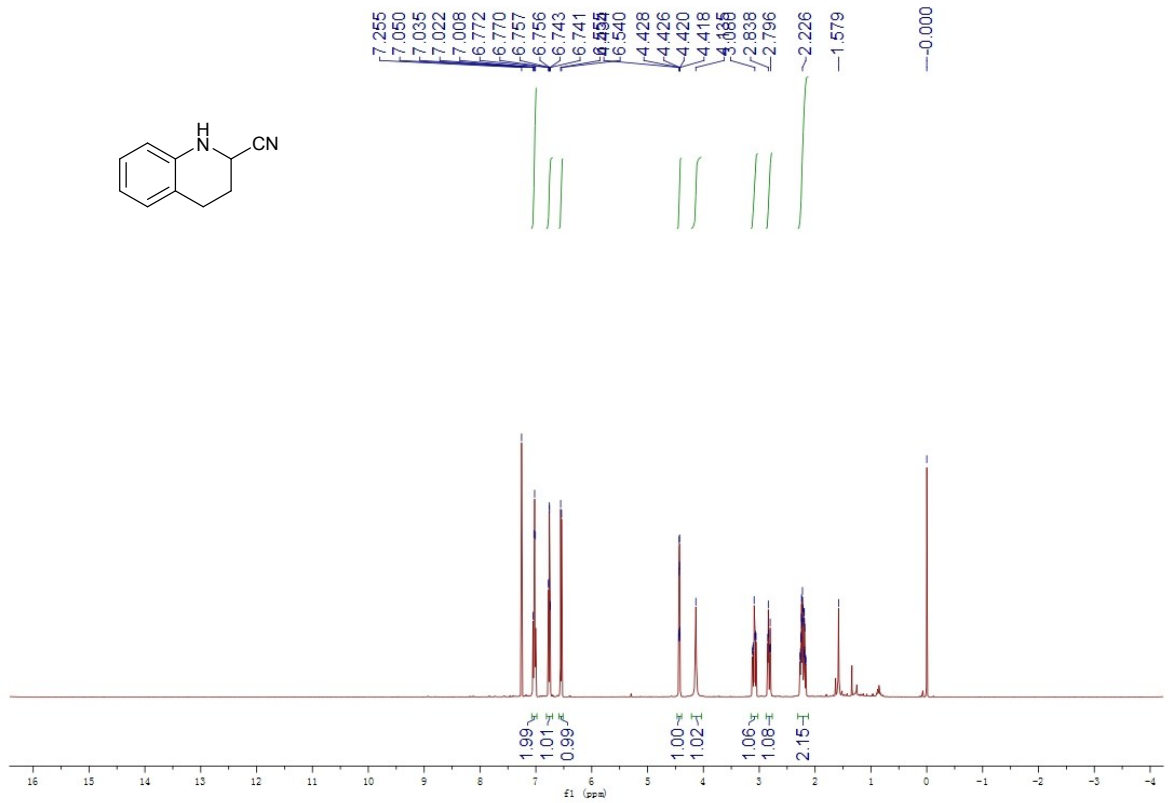

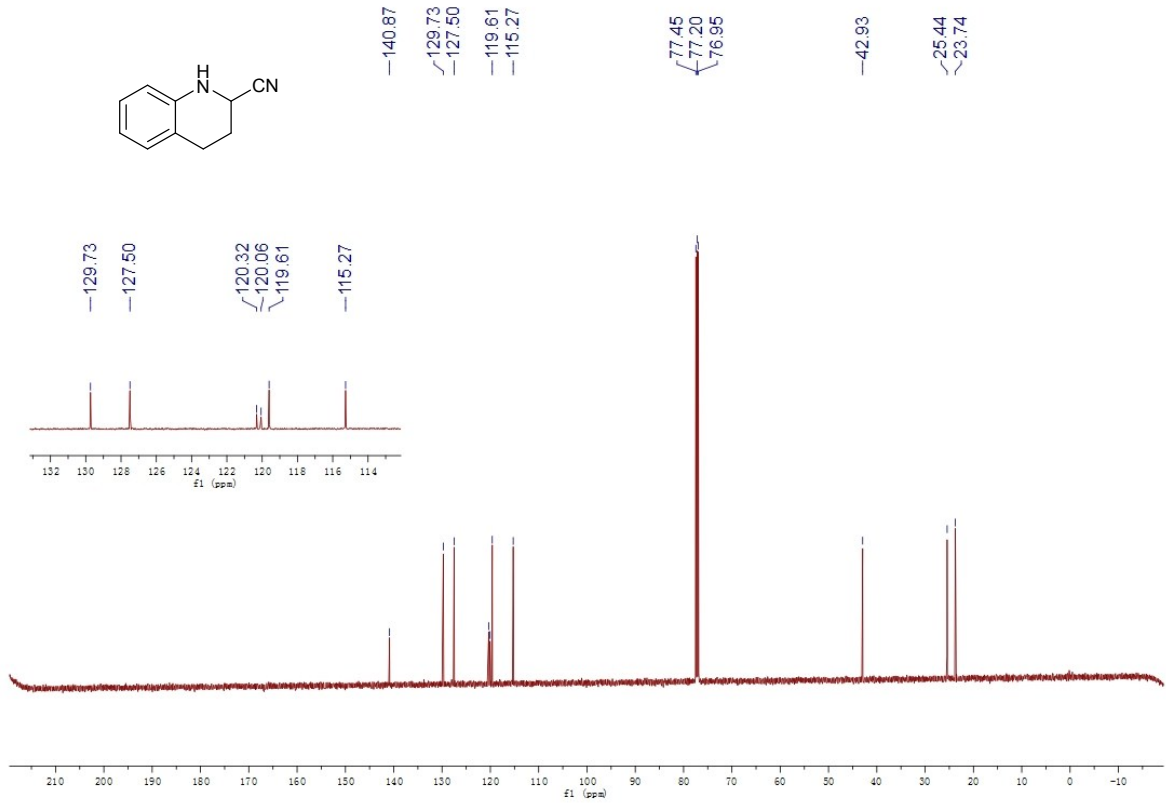

**8-iodo-1,2,3,4-tetrahydroquinoline (5)**

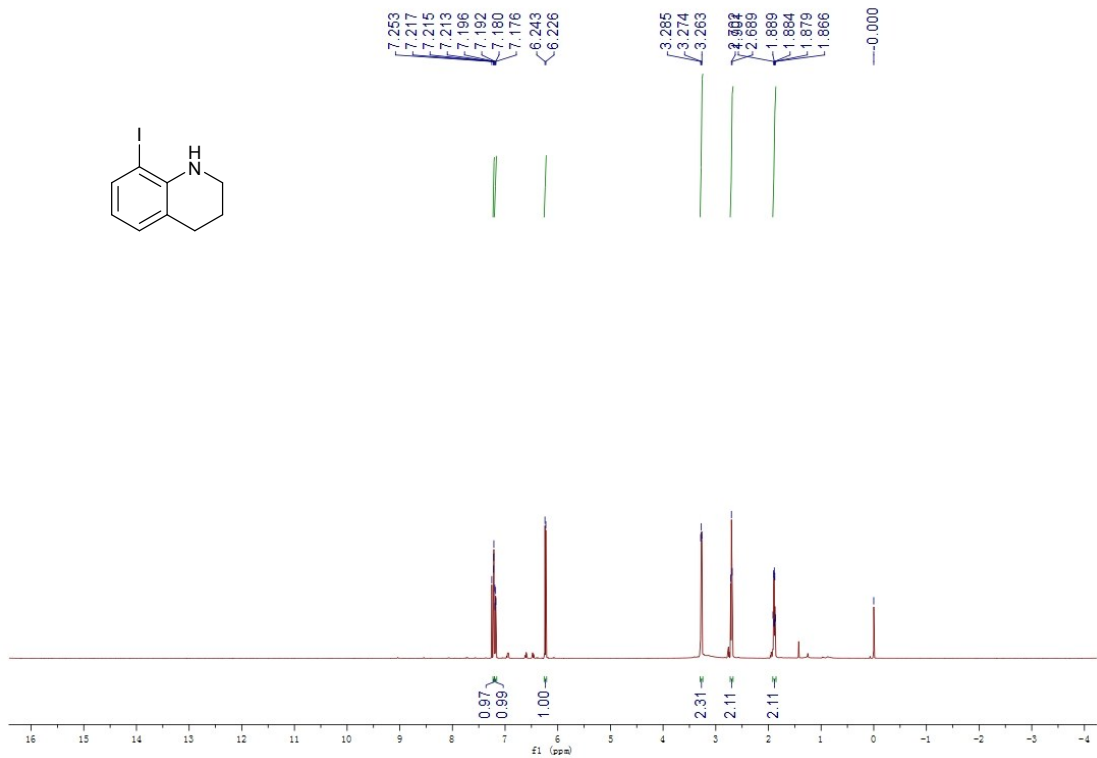

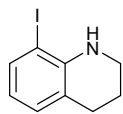

—144.51  
—137.87  
—135.38  
—124.19  
—116.24

77.45  
77.34  
77.20  
76.95

—41.87

—26.85  
—21.75

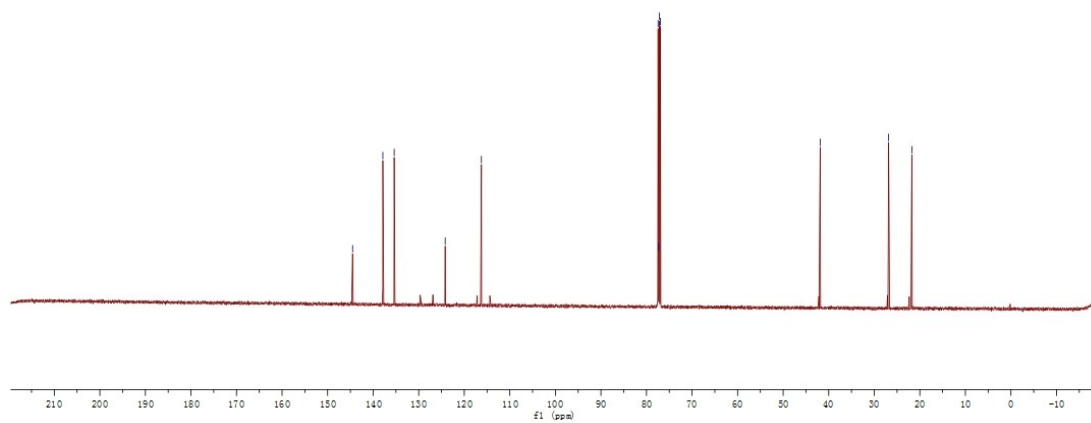

Supplement: c5cc10346k1.pdf [file c5cc10346k1.pdf]
